# Supplementary material for: 16S rRNA Gene Amplicon Based Metagenomic Signatures of Rhizobiome Community in Rice Field During Various Growth Stages
Source: PubMed Central journal article supplement (PMC6764247; doi:10.3389/fmicb.2019.02103), 2019-09-20
Supplement: Data_Sheet_1.pdf [file Data_Sheet_1.pdf]

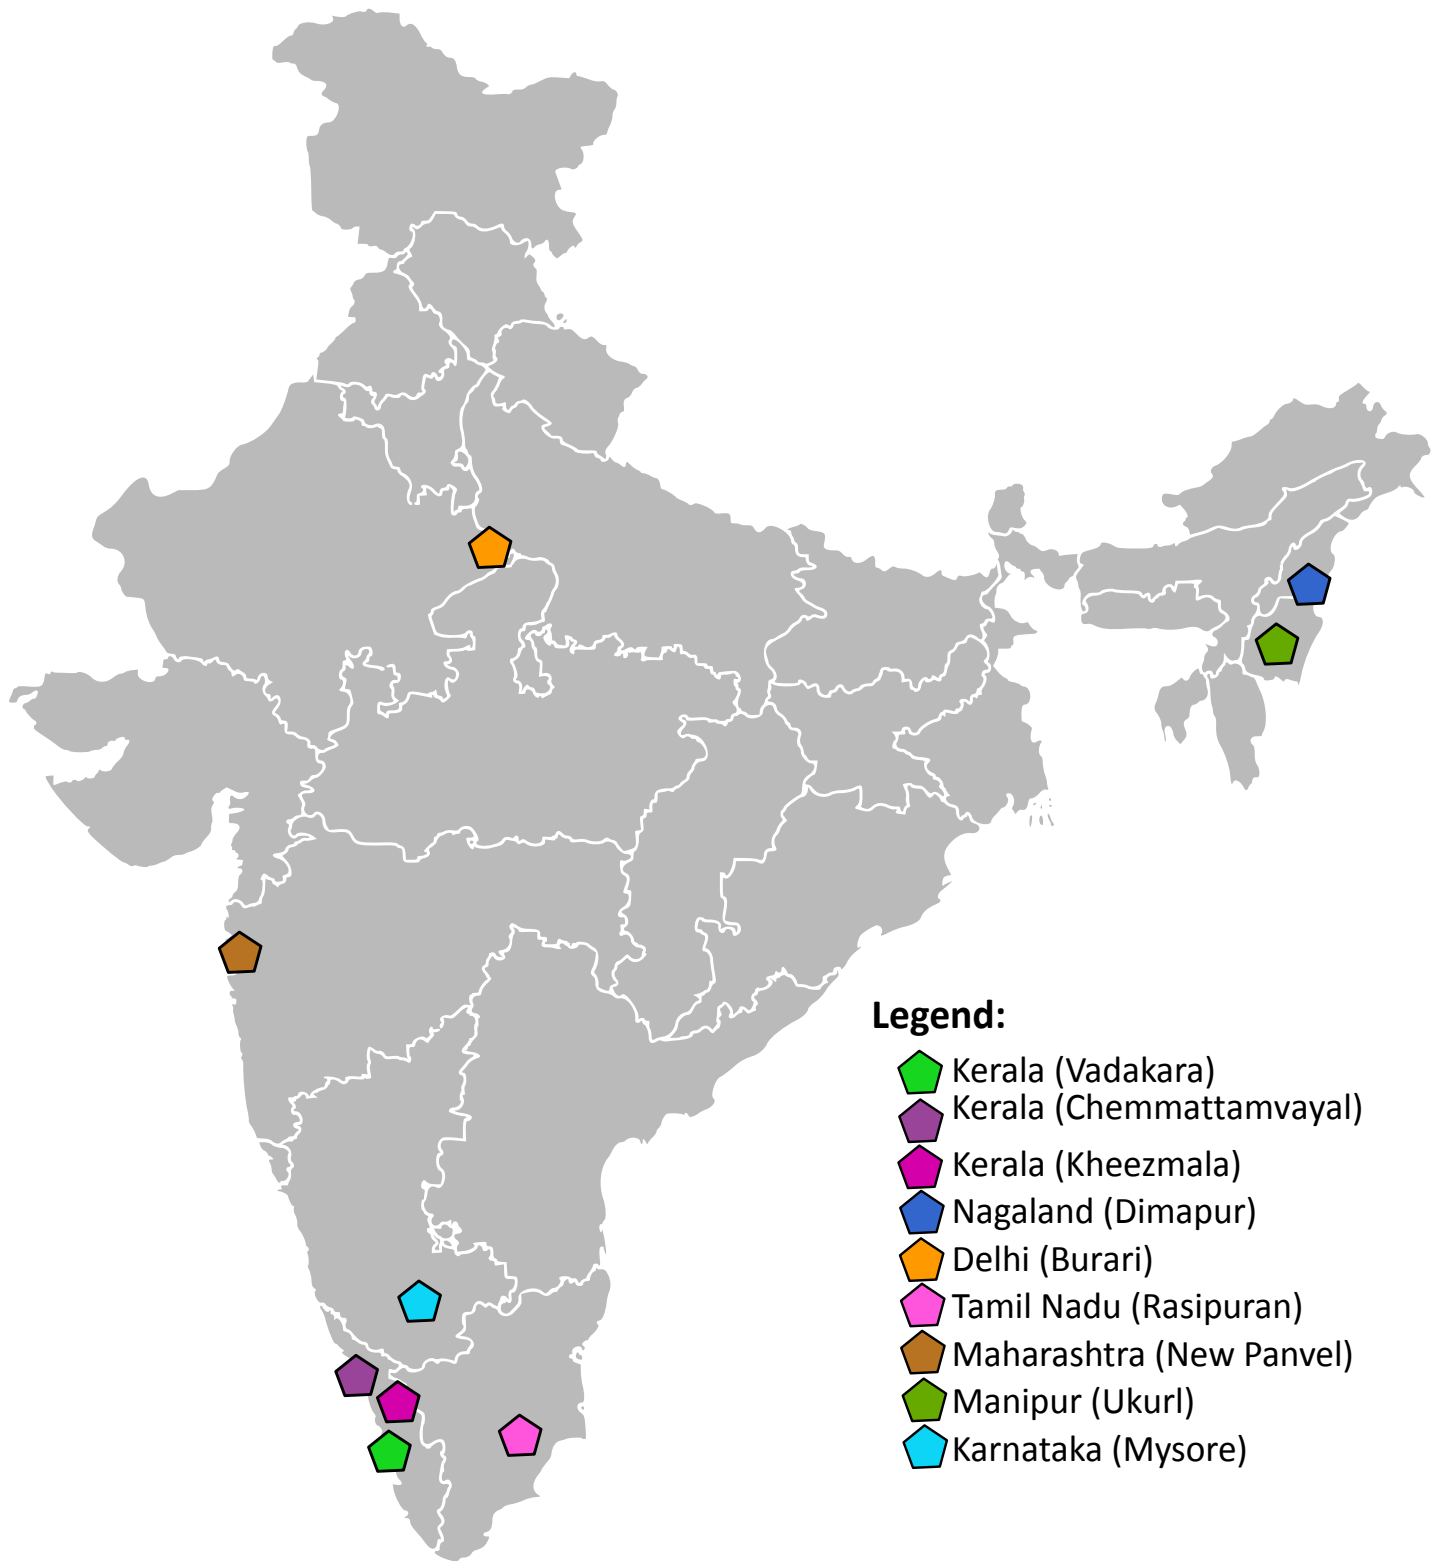

Figure S1: Graphical representation of sampling location within the study.

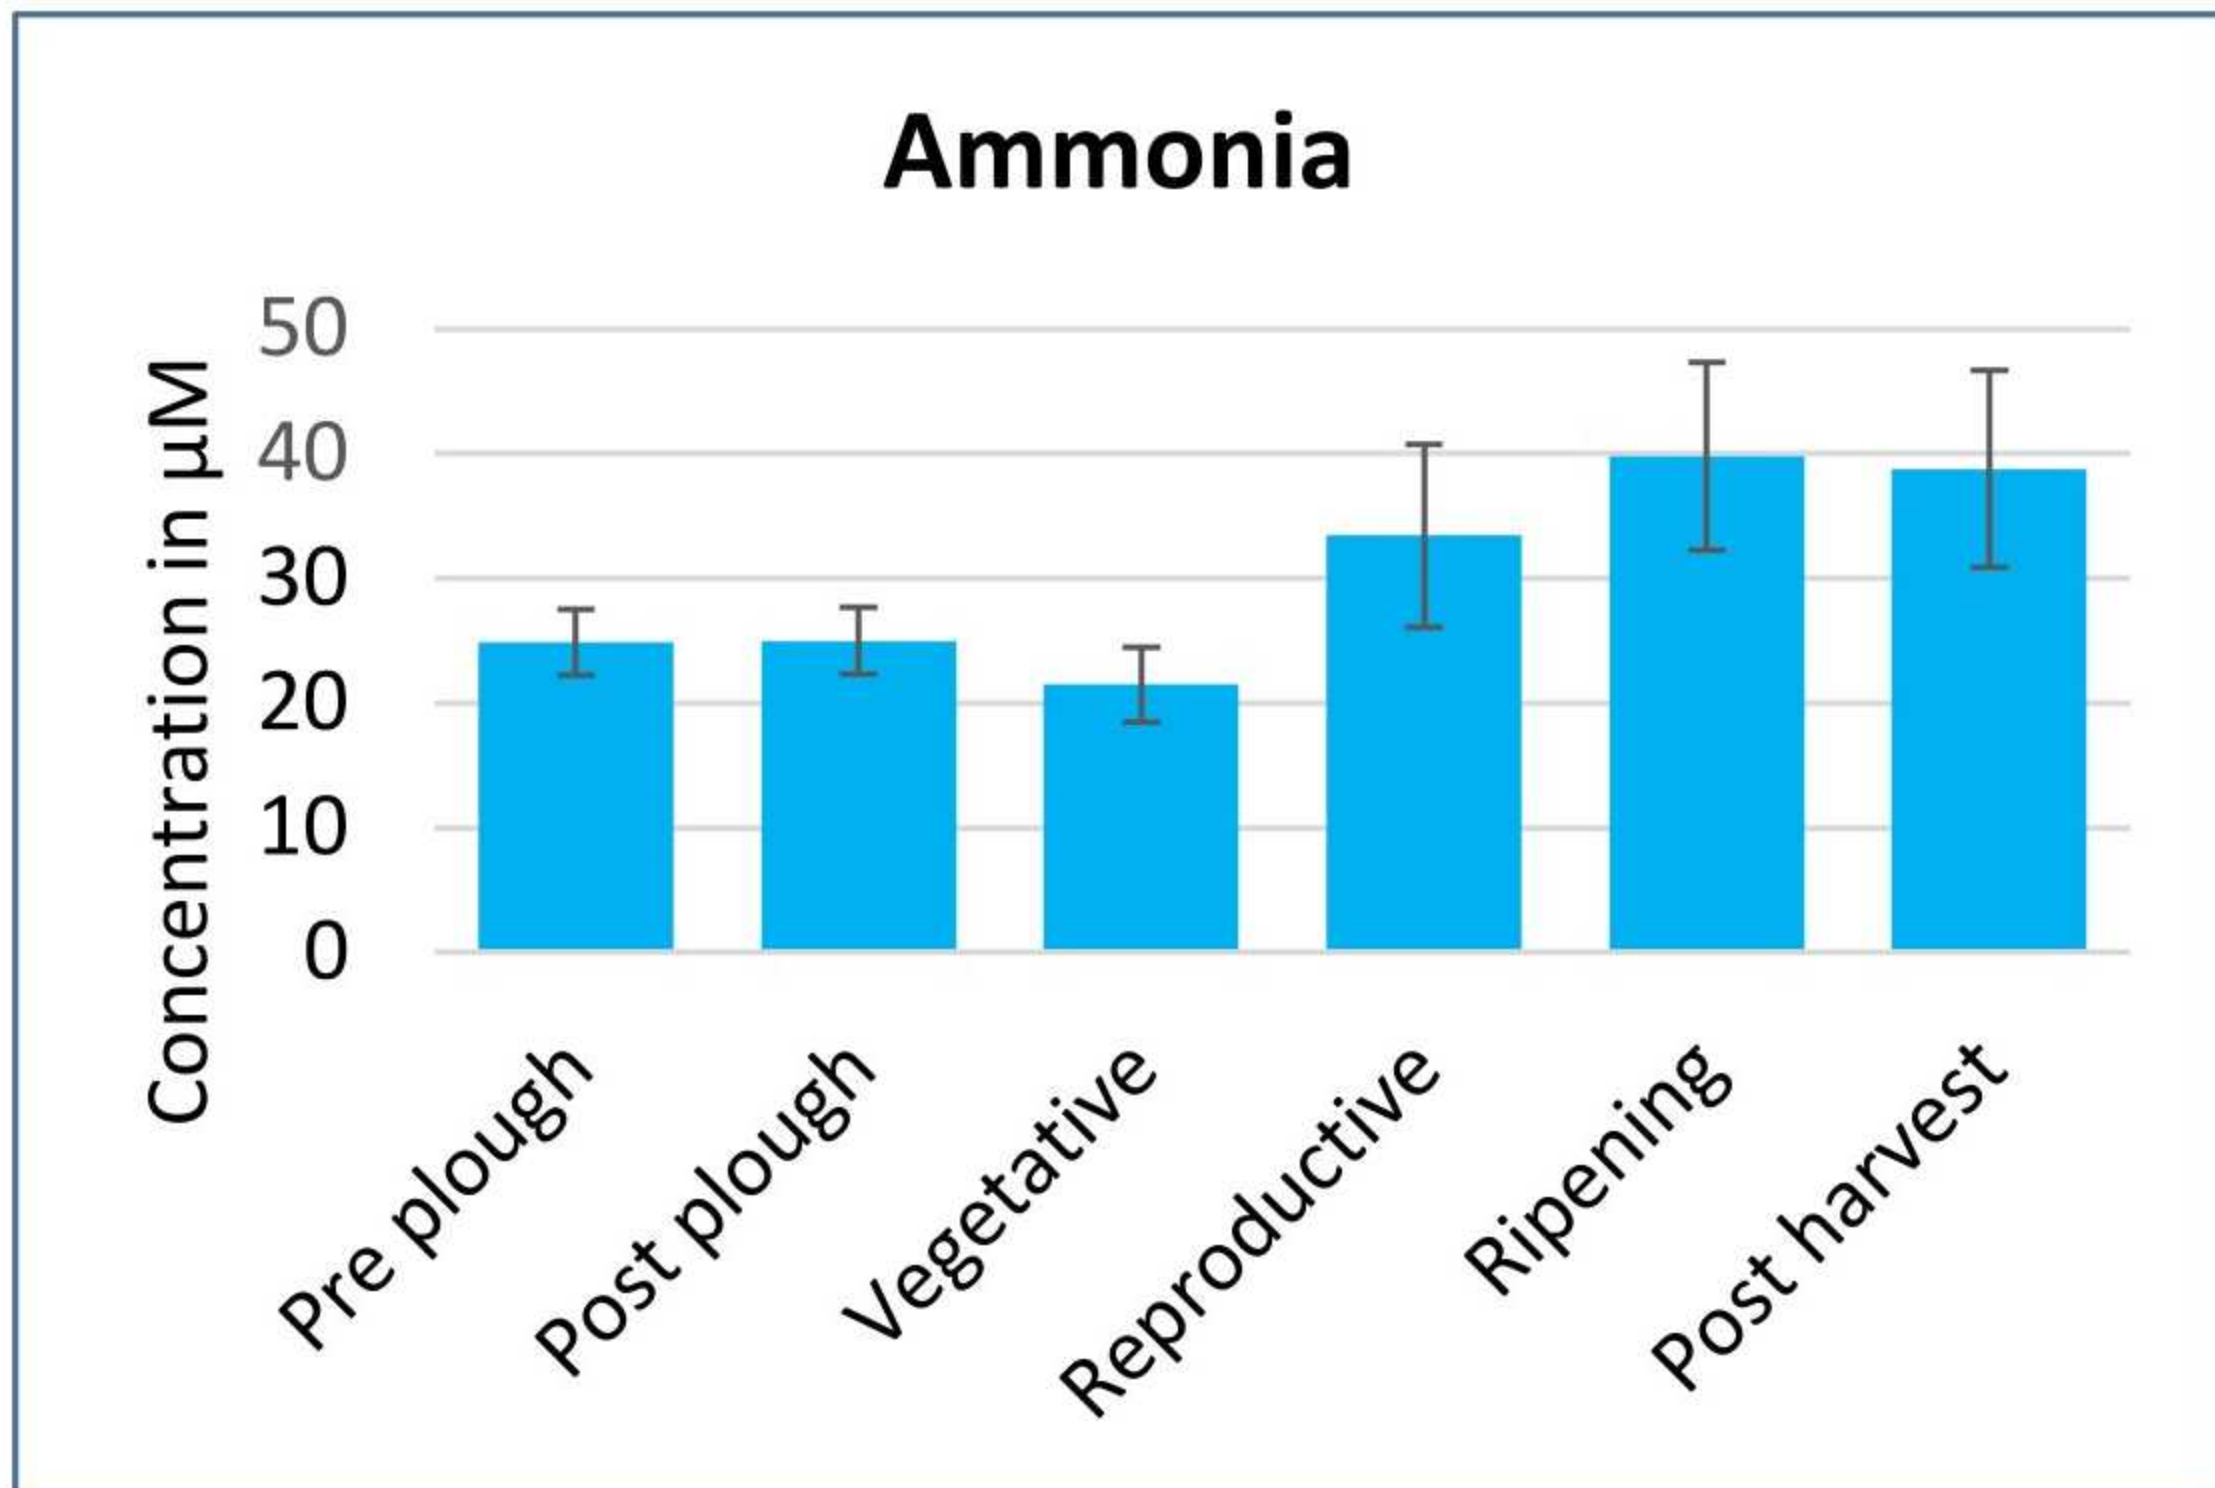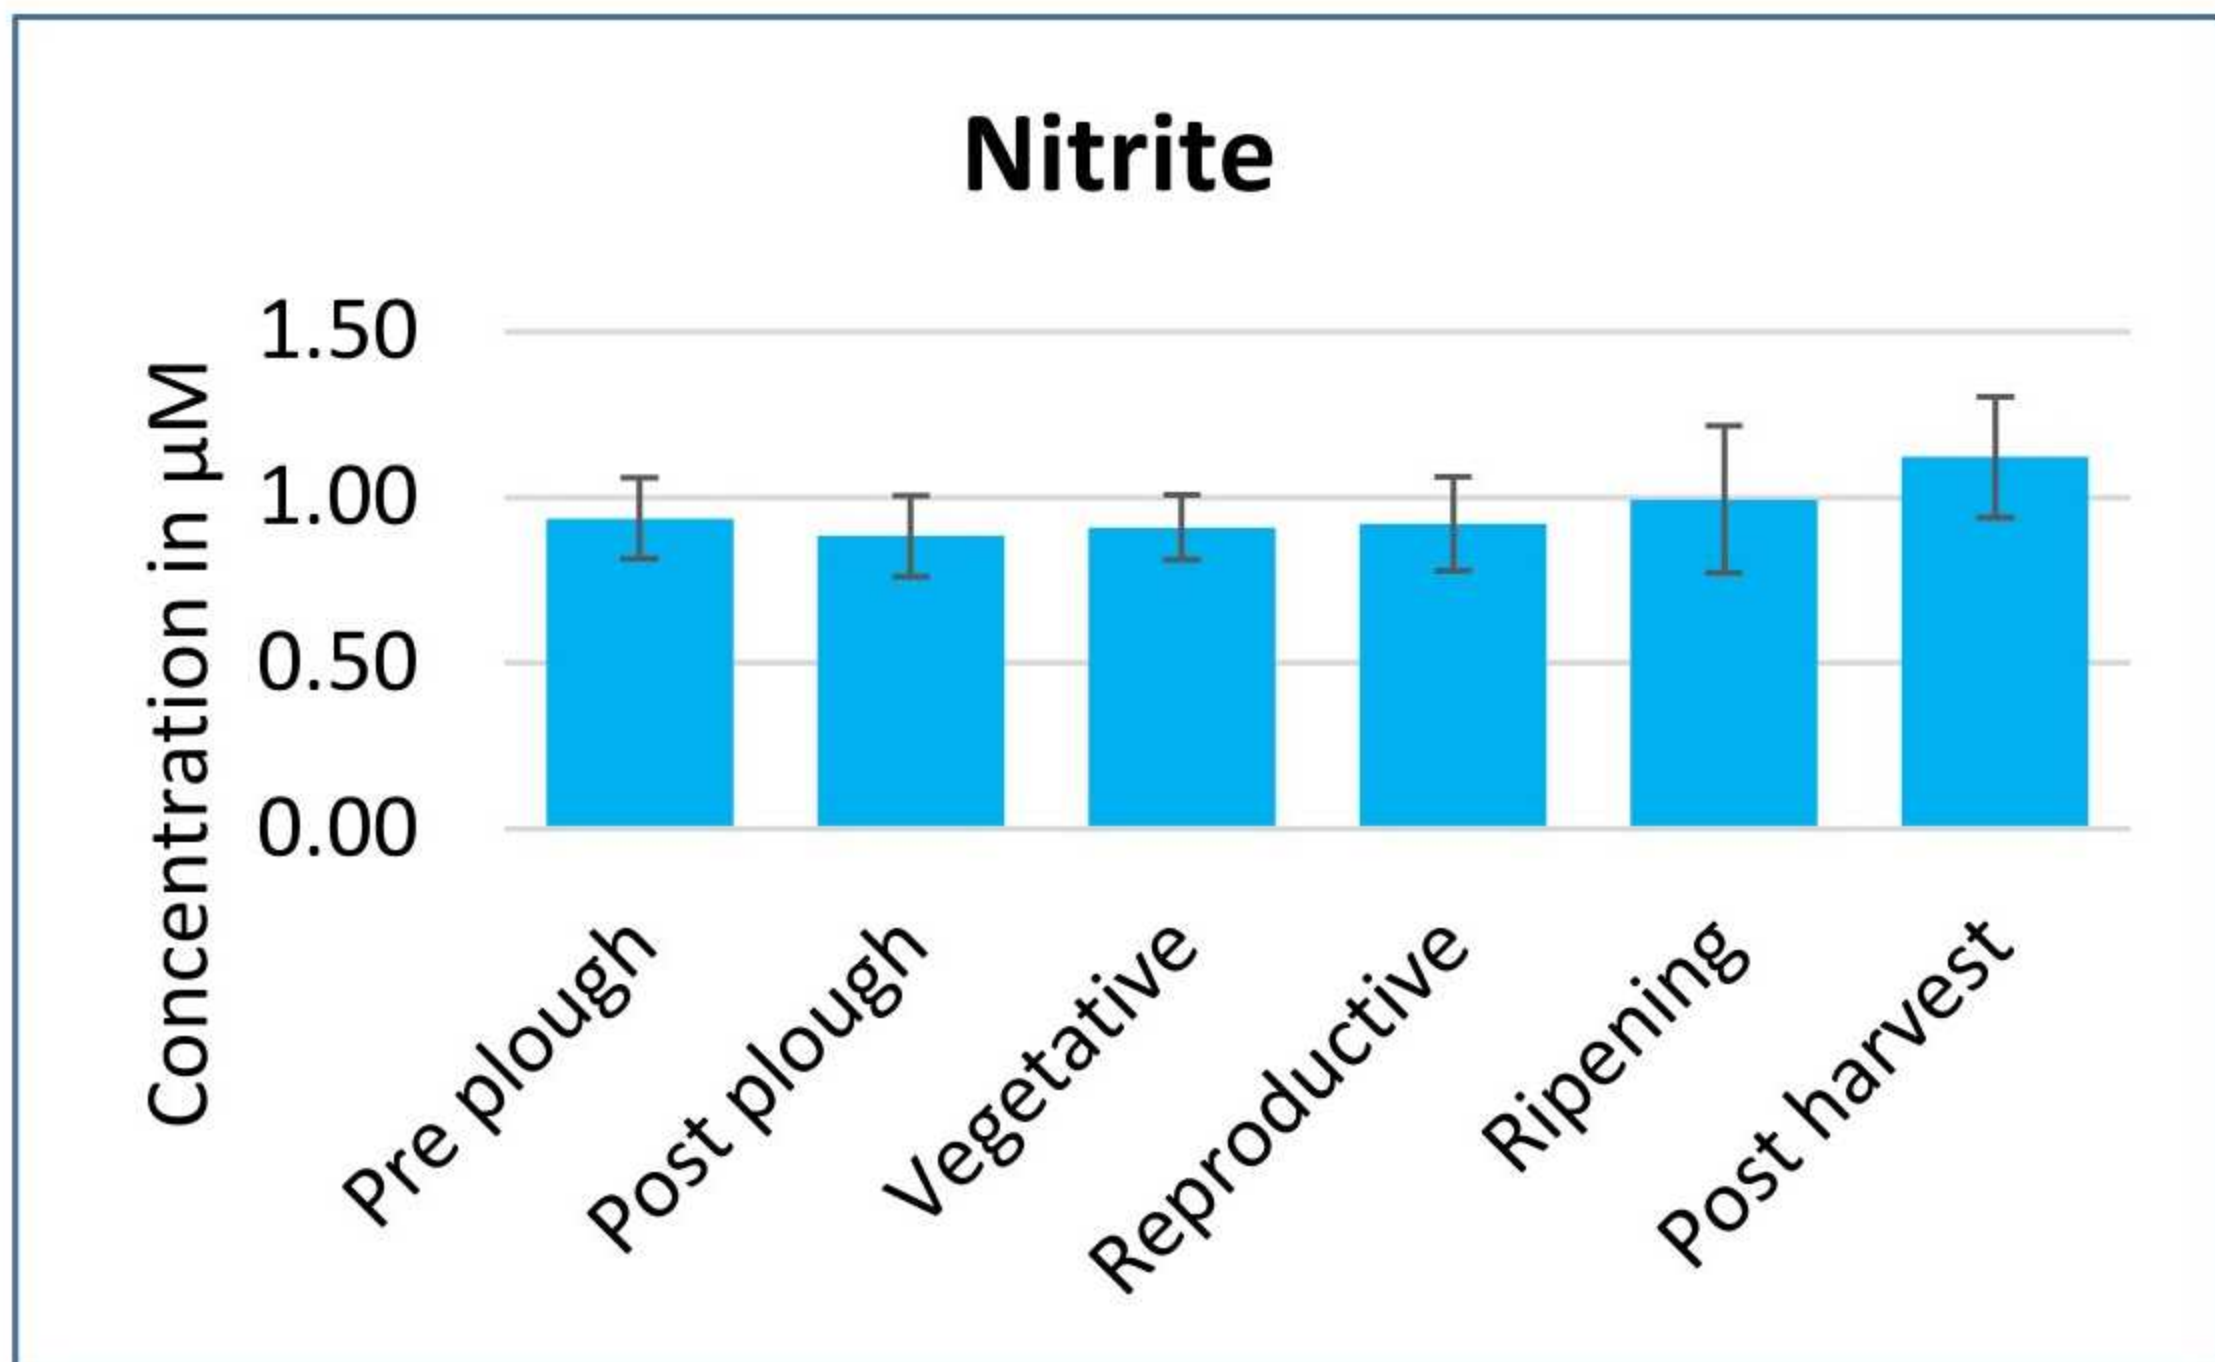

Figure S2: Ammonia and nitrite concentration ( $\mu\text{M}$ ): The concentration of ammonia had a sharp rise during the cropped stages. Nitrite concentration also rose during cropped stages, however, to a much lesser extent as compared to ammonia.

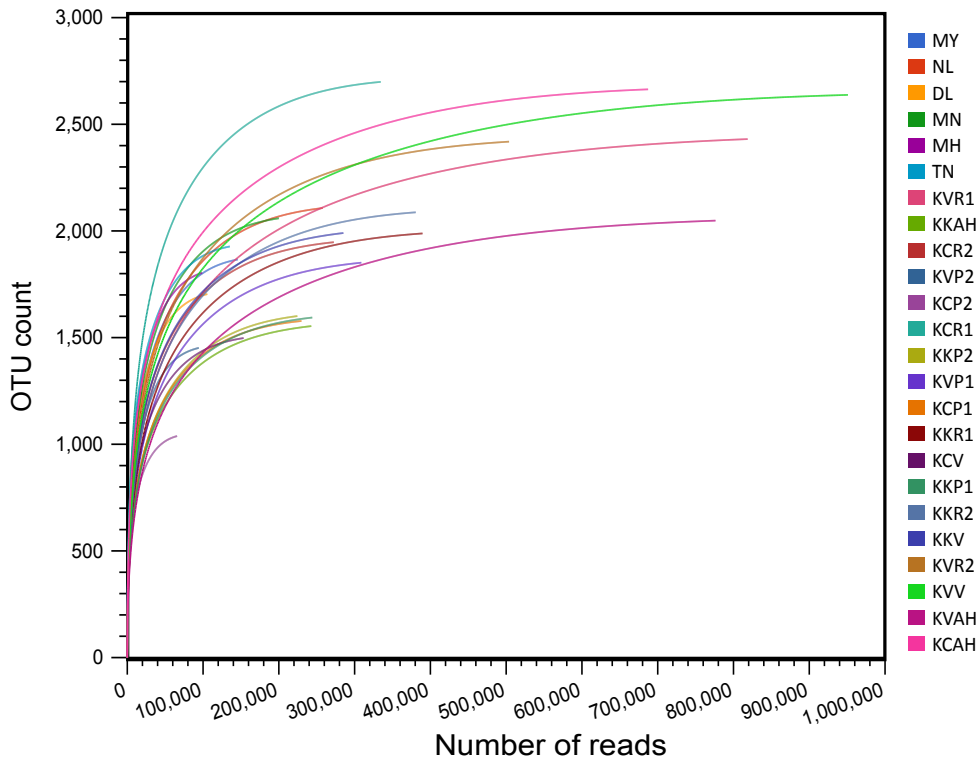

Figure S3: Rarefaction curve of the samples show plateau formation indicating sufficient sequencing depth.

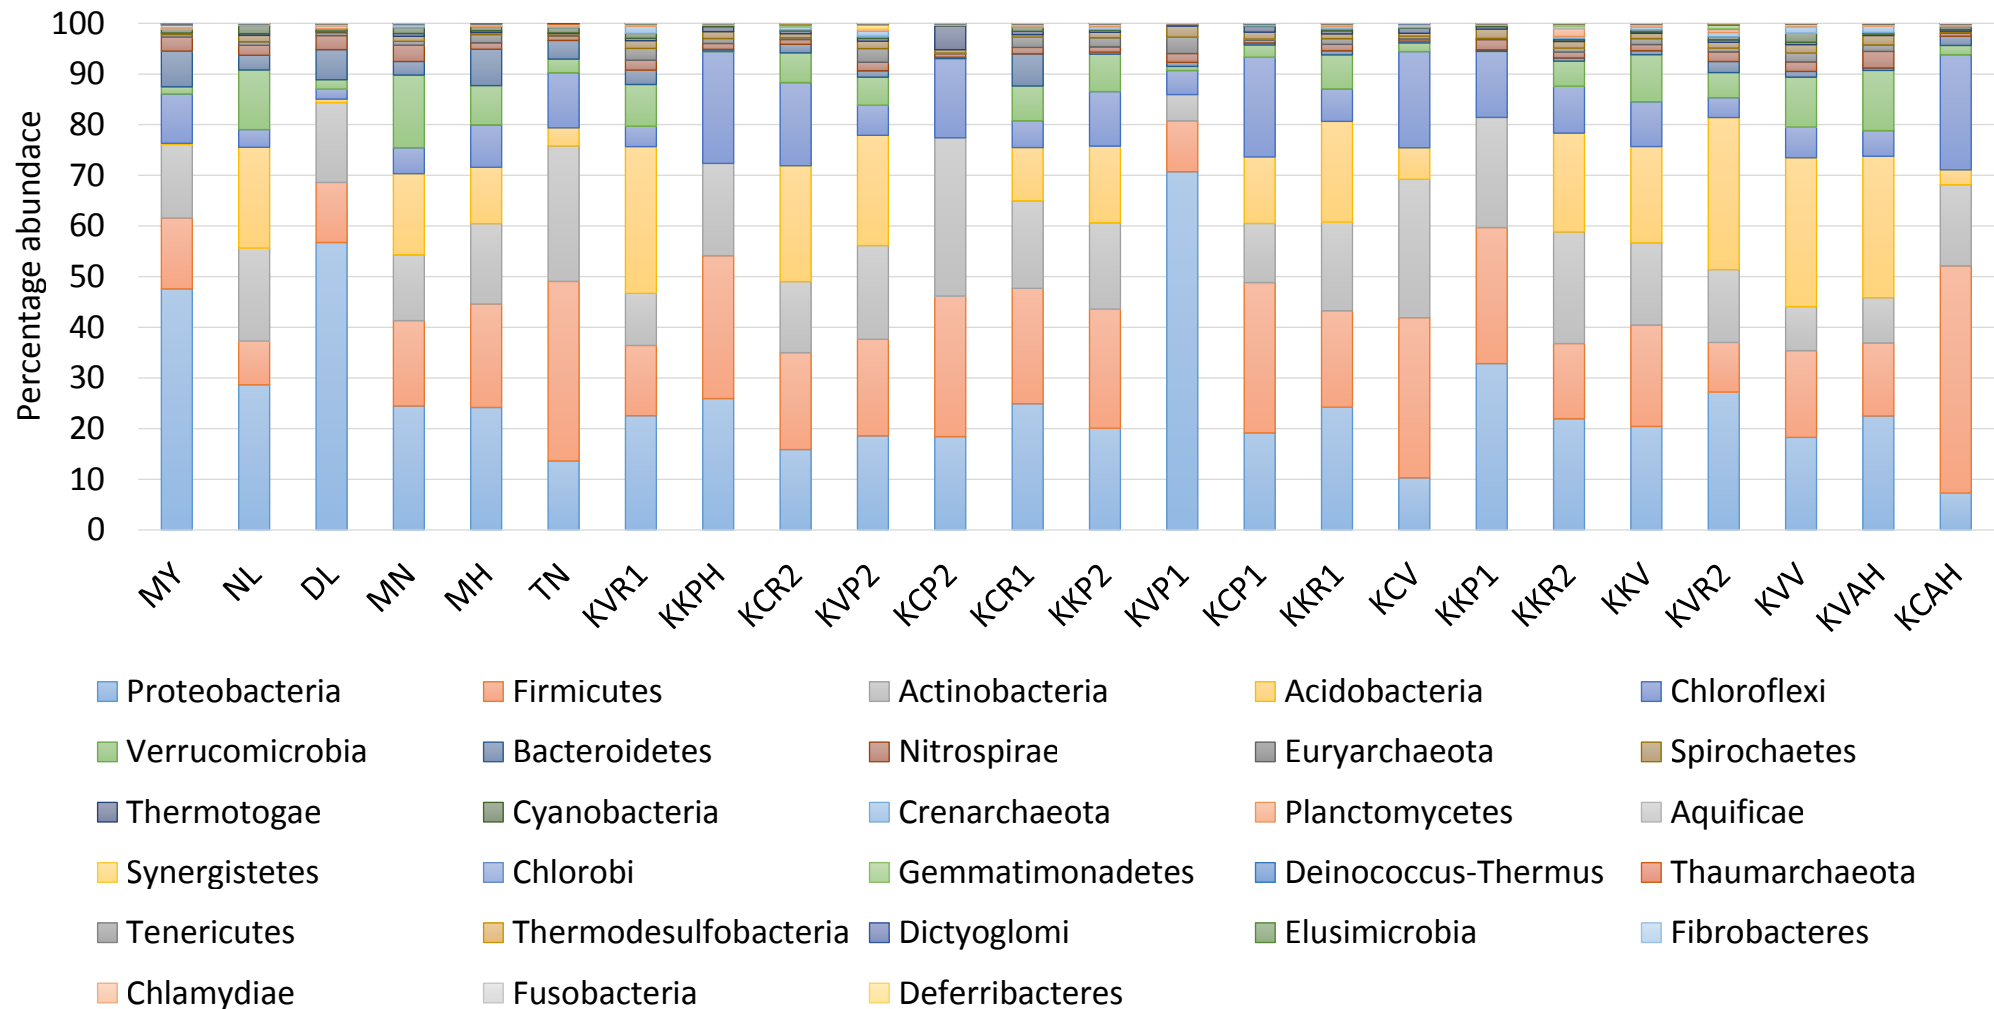

Figure S4: Archeal (Crenarchaeota, Euryarchaeota, and, Thaumarchaeota) and bacterial phyla stack bar chart

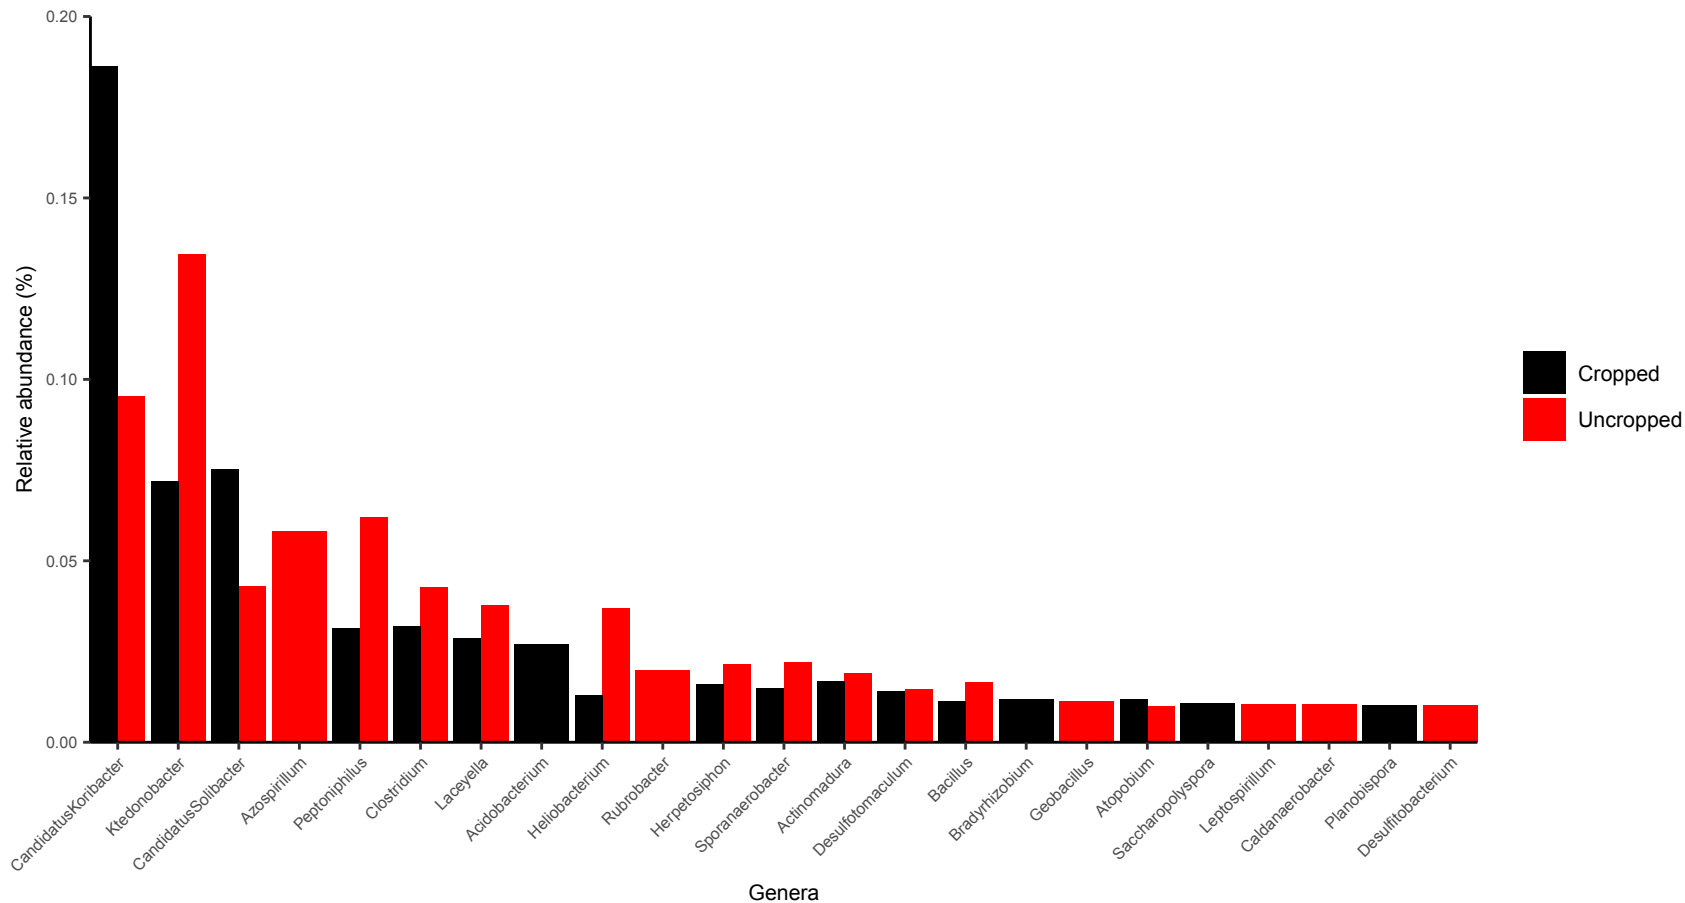

Figure S5: Twenty -three genera were found to have a relative abundance of above 1% in any sample

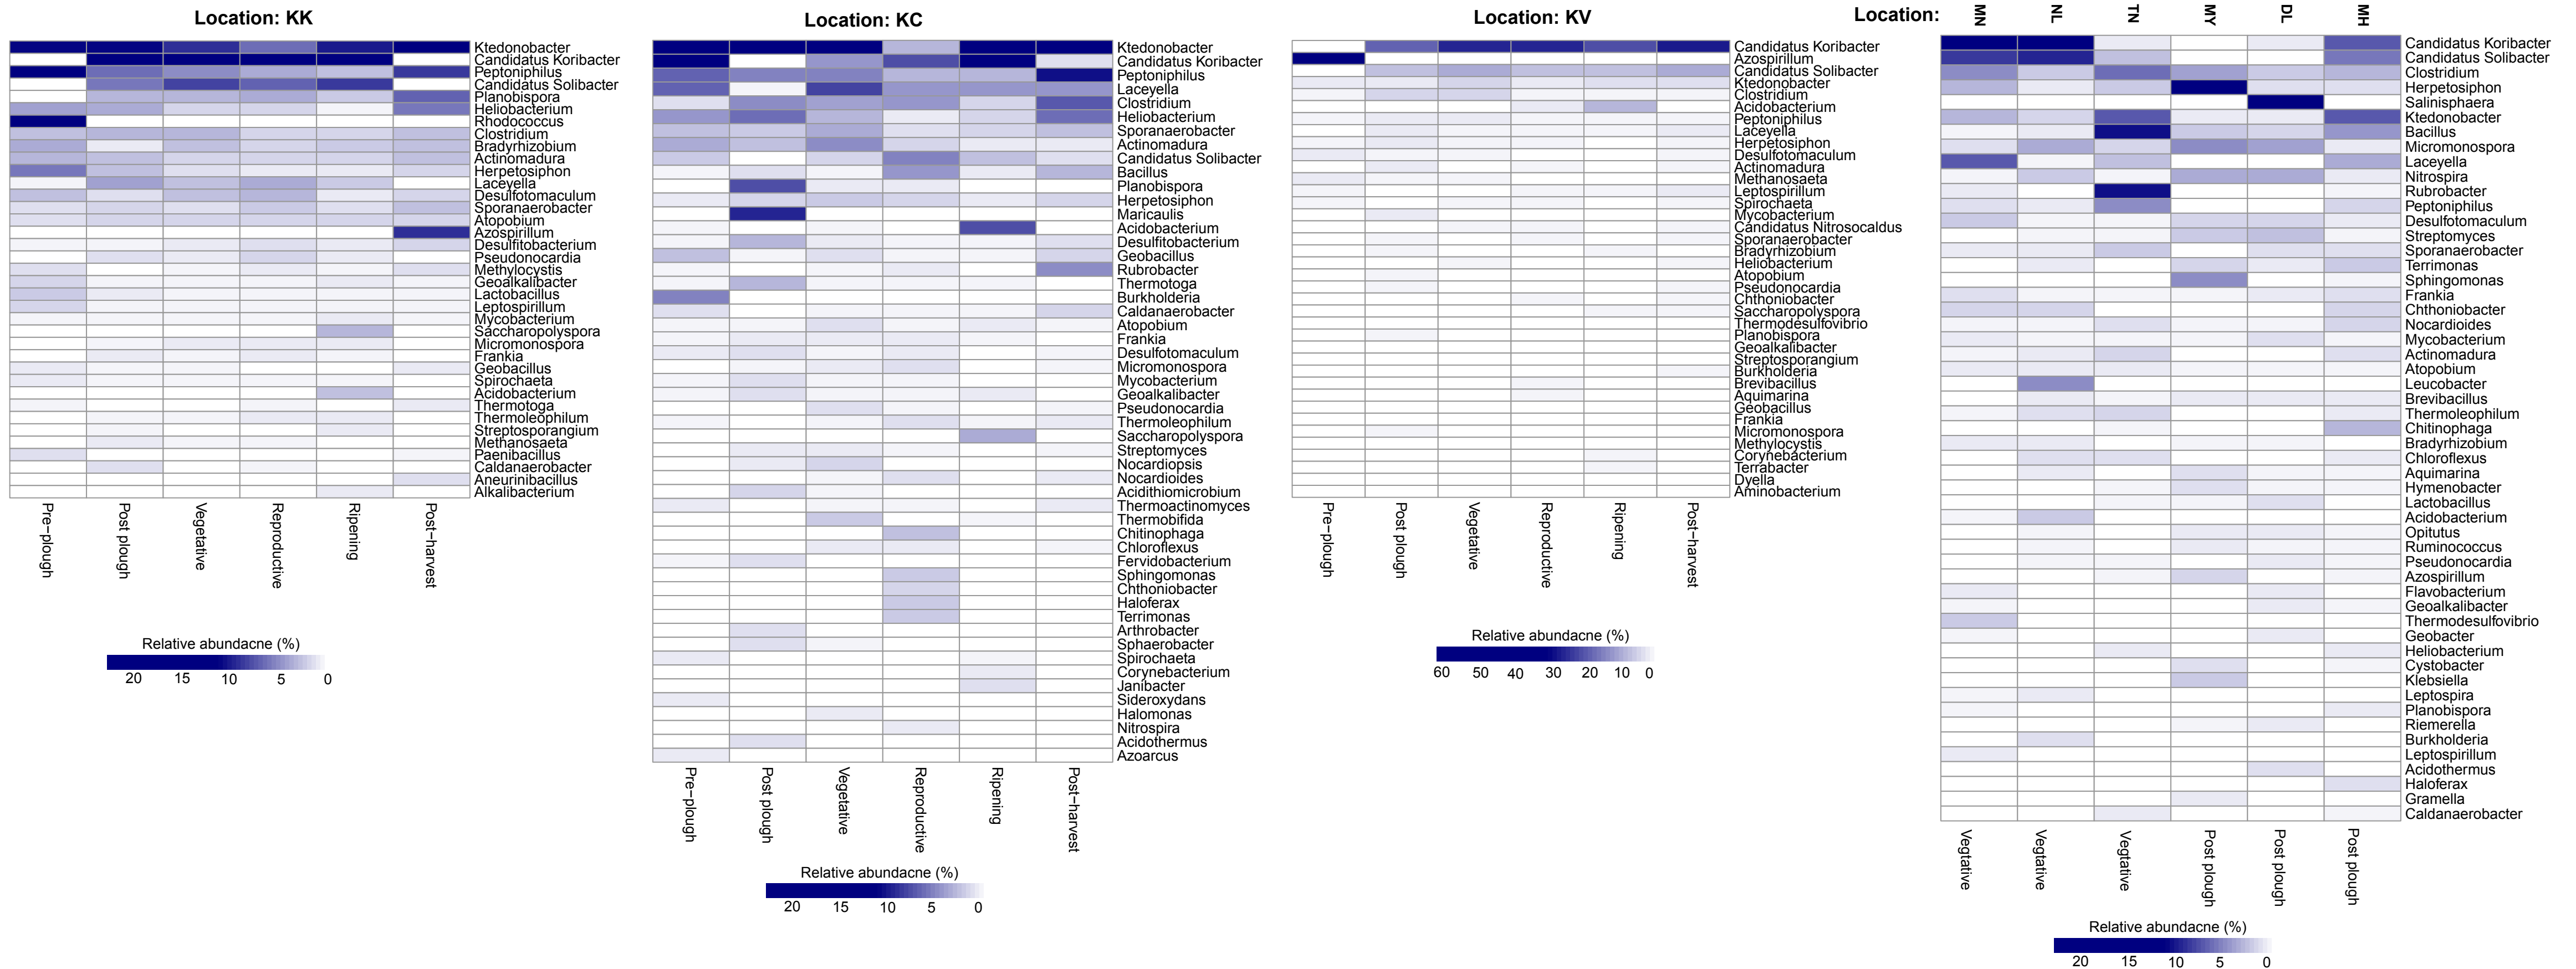

Figure S6: Heatmap representation of dominant (>11% relative abundance) genus at various cultivation stage in different locations.

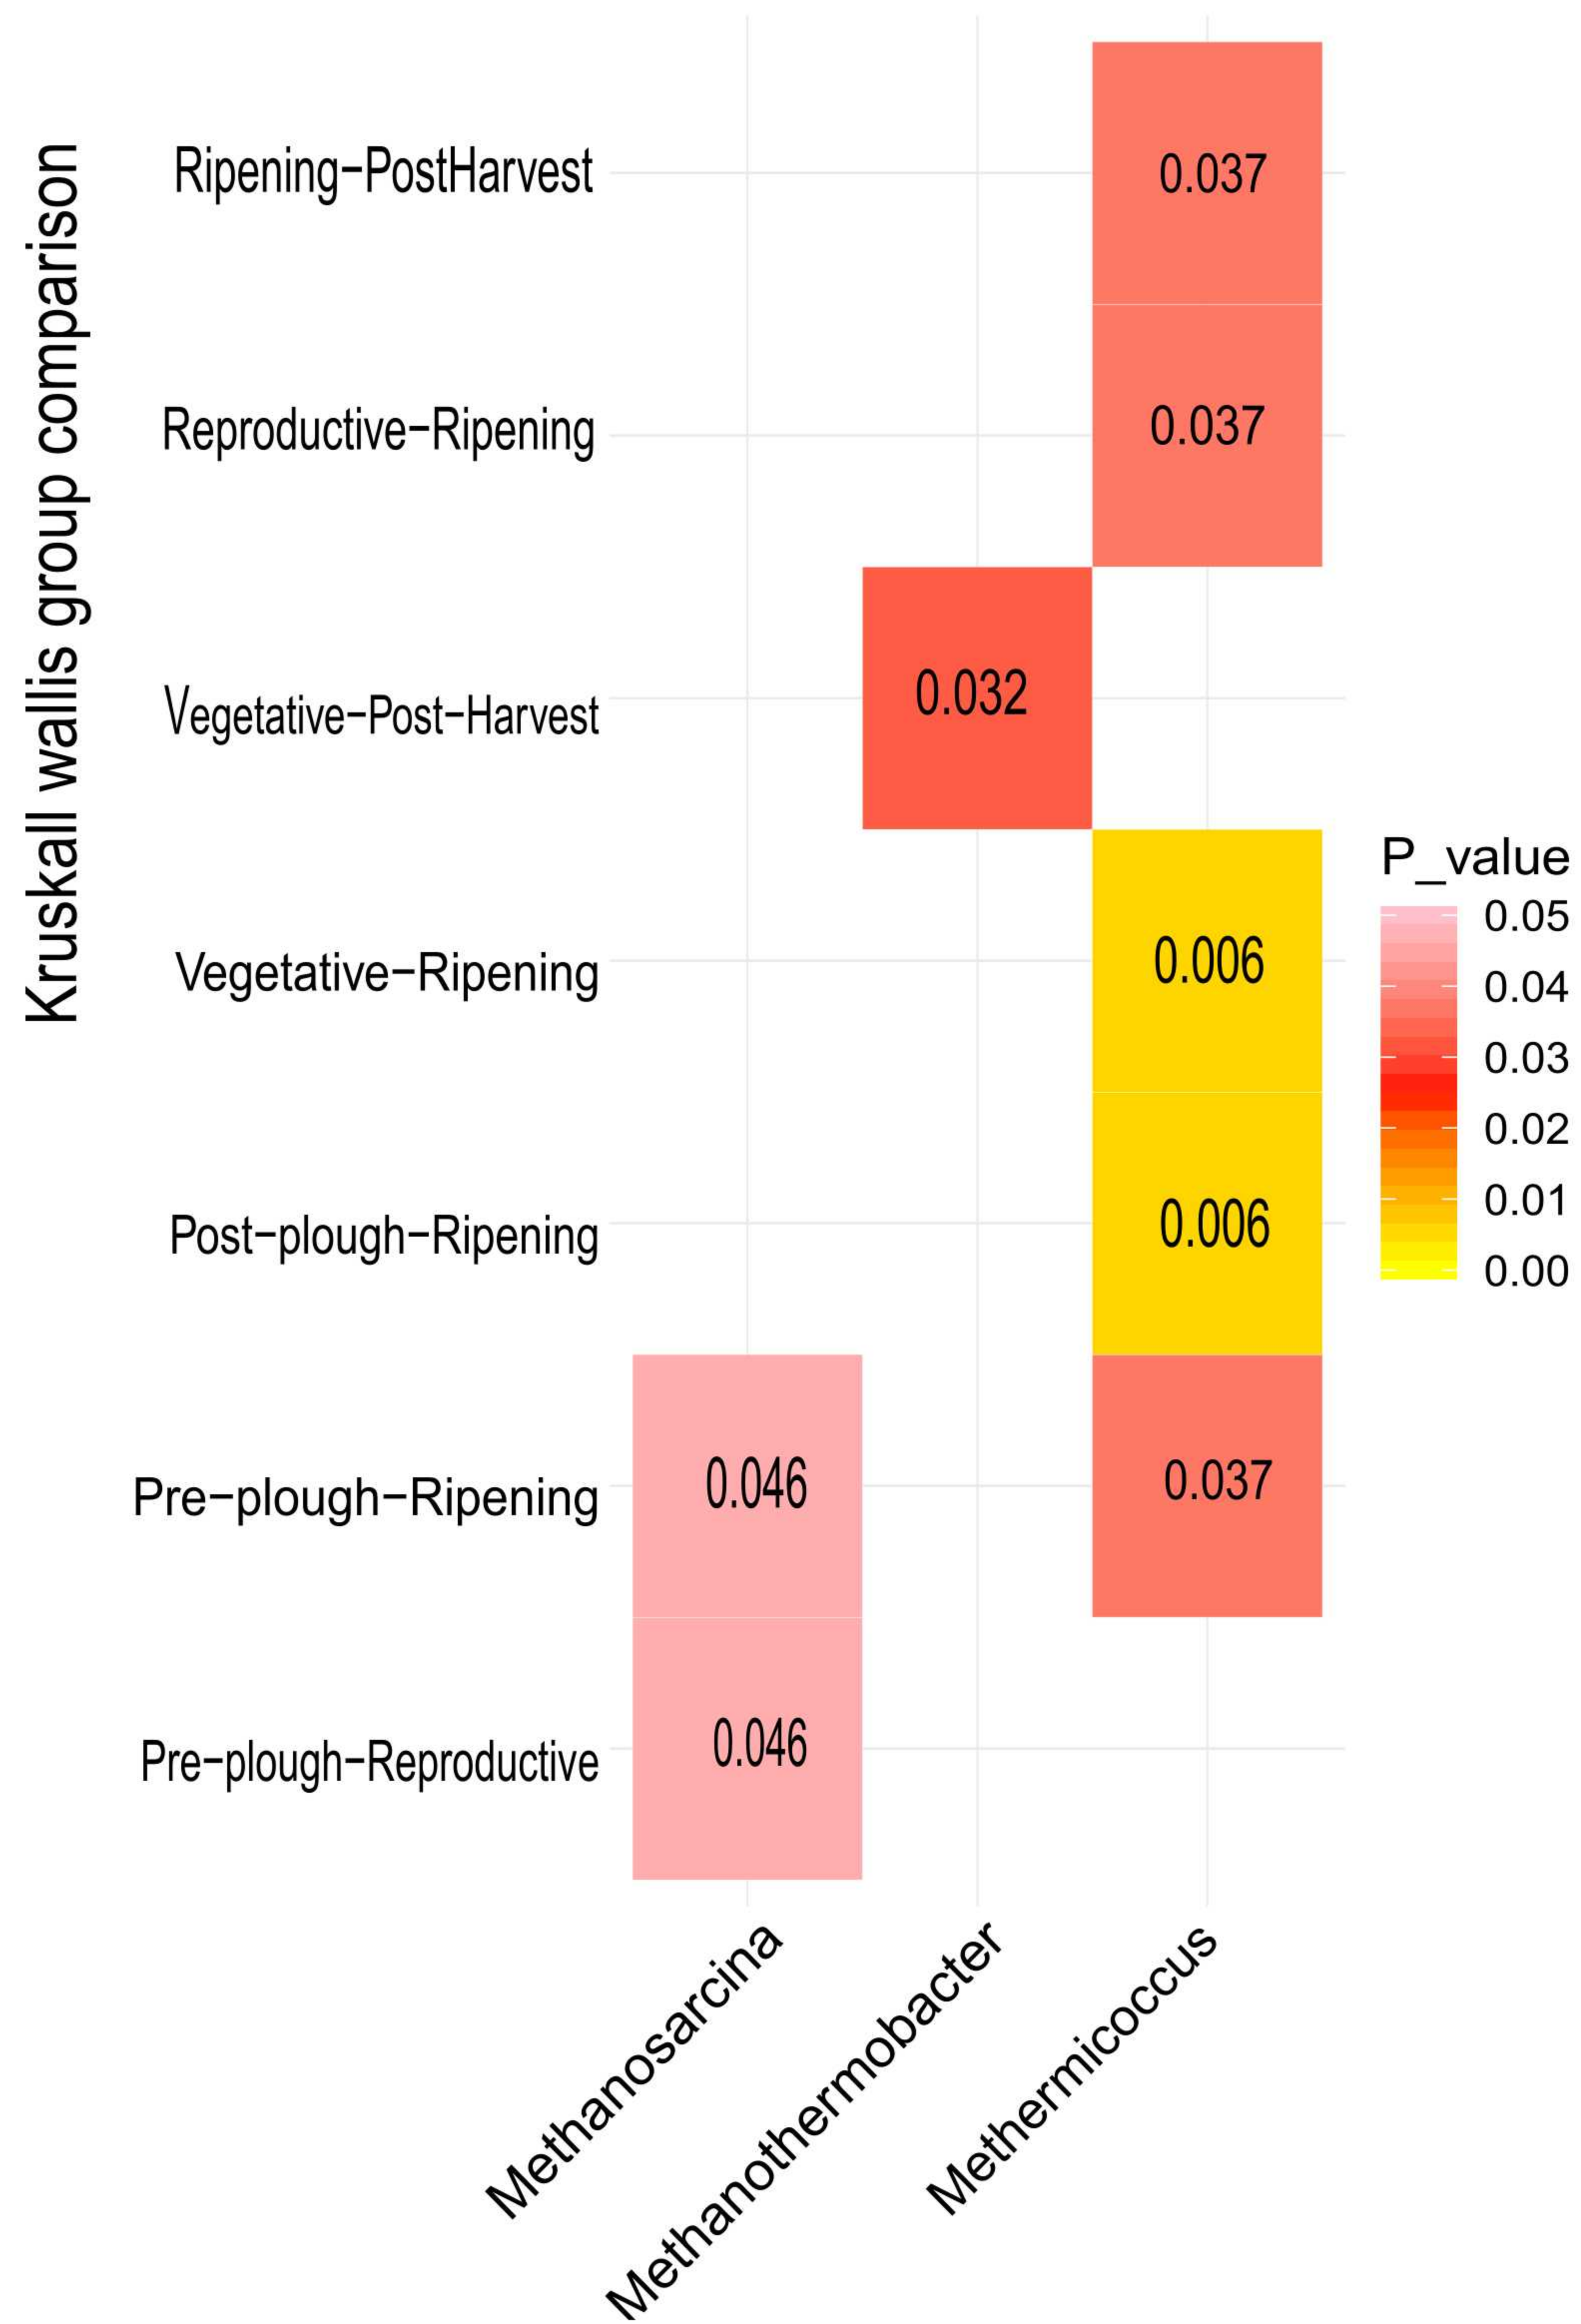

Figure S7: Significant changes of OTU proportion among the groups. Kruskal Wallis comparison. P-value <0.05.

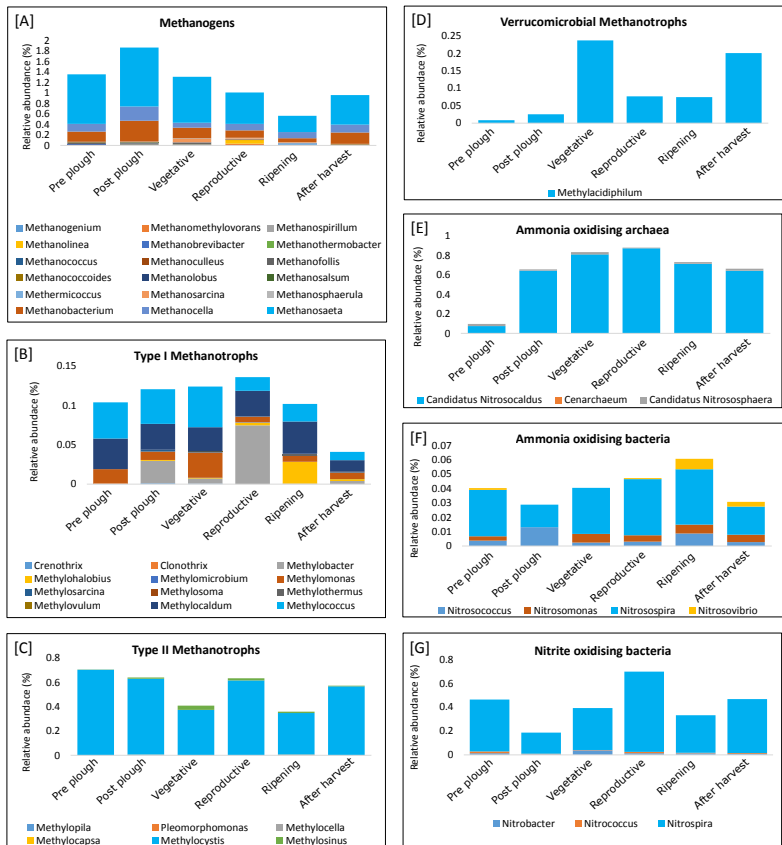

Figure S8: Relative abundance bar chart of [A] methanogens, [B] methanotrophs, [C] ammonia oxidizers and [D] nitrite oxidizers.



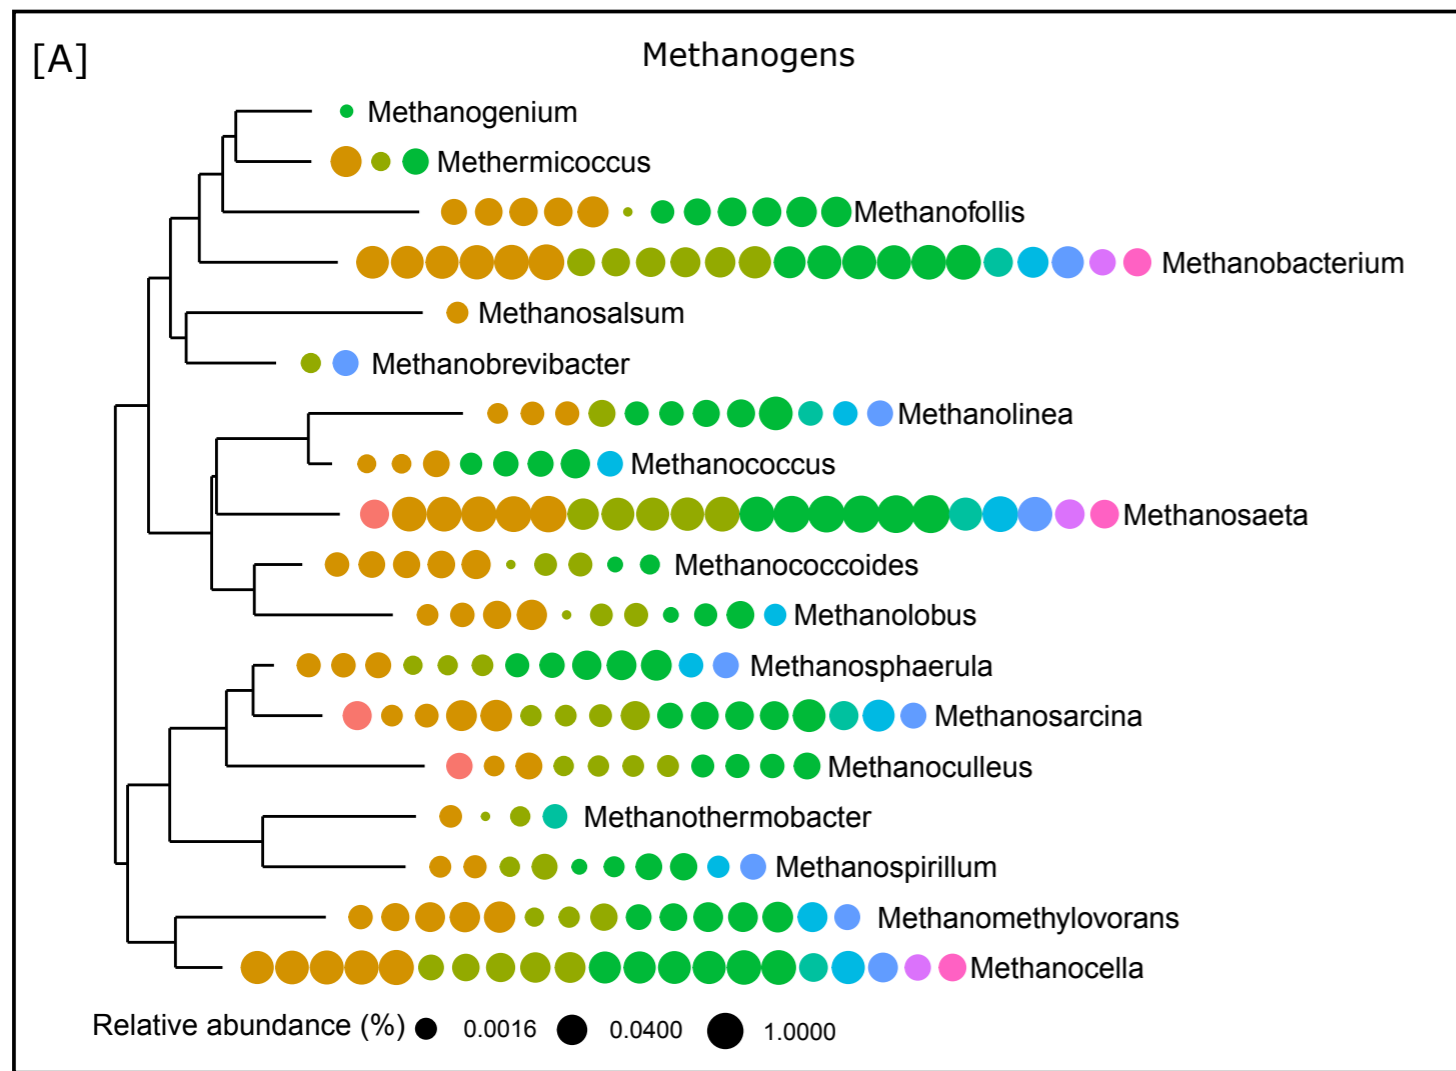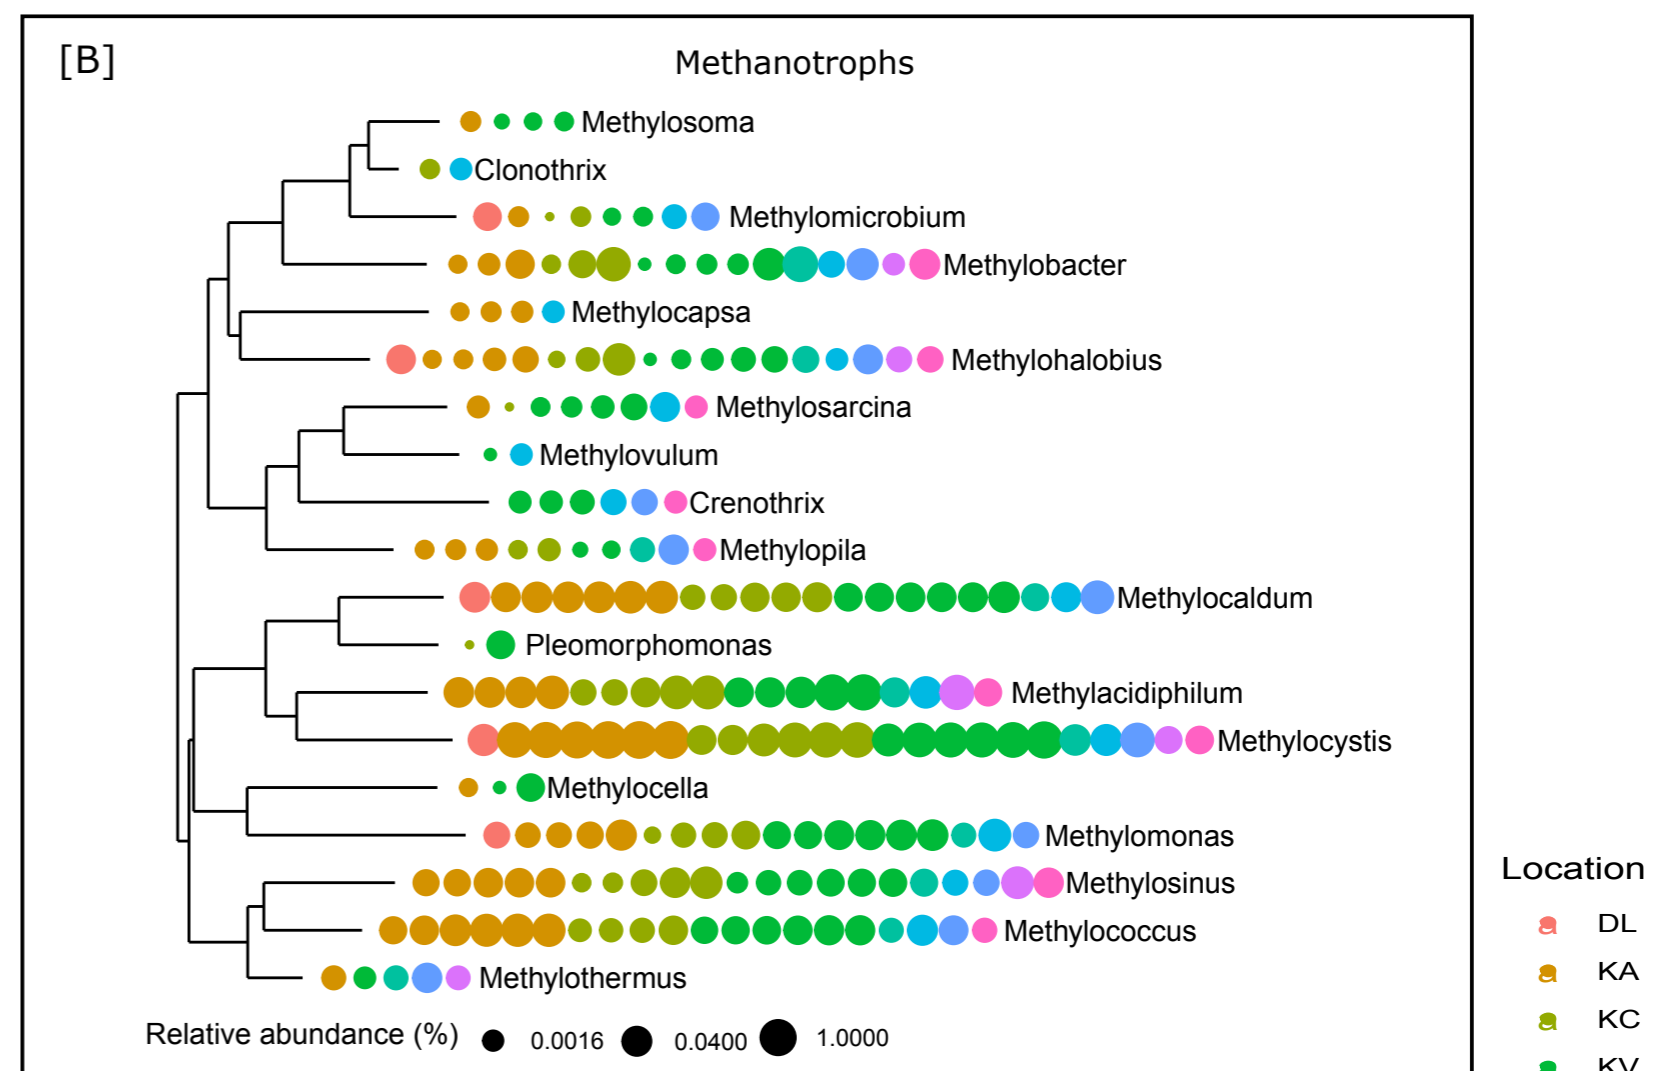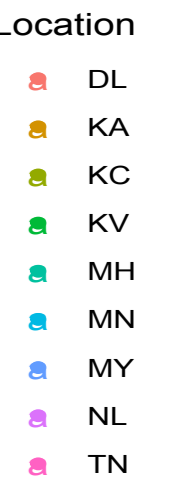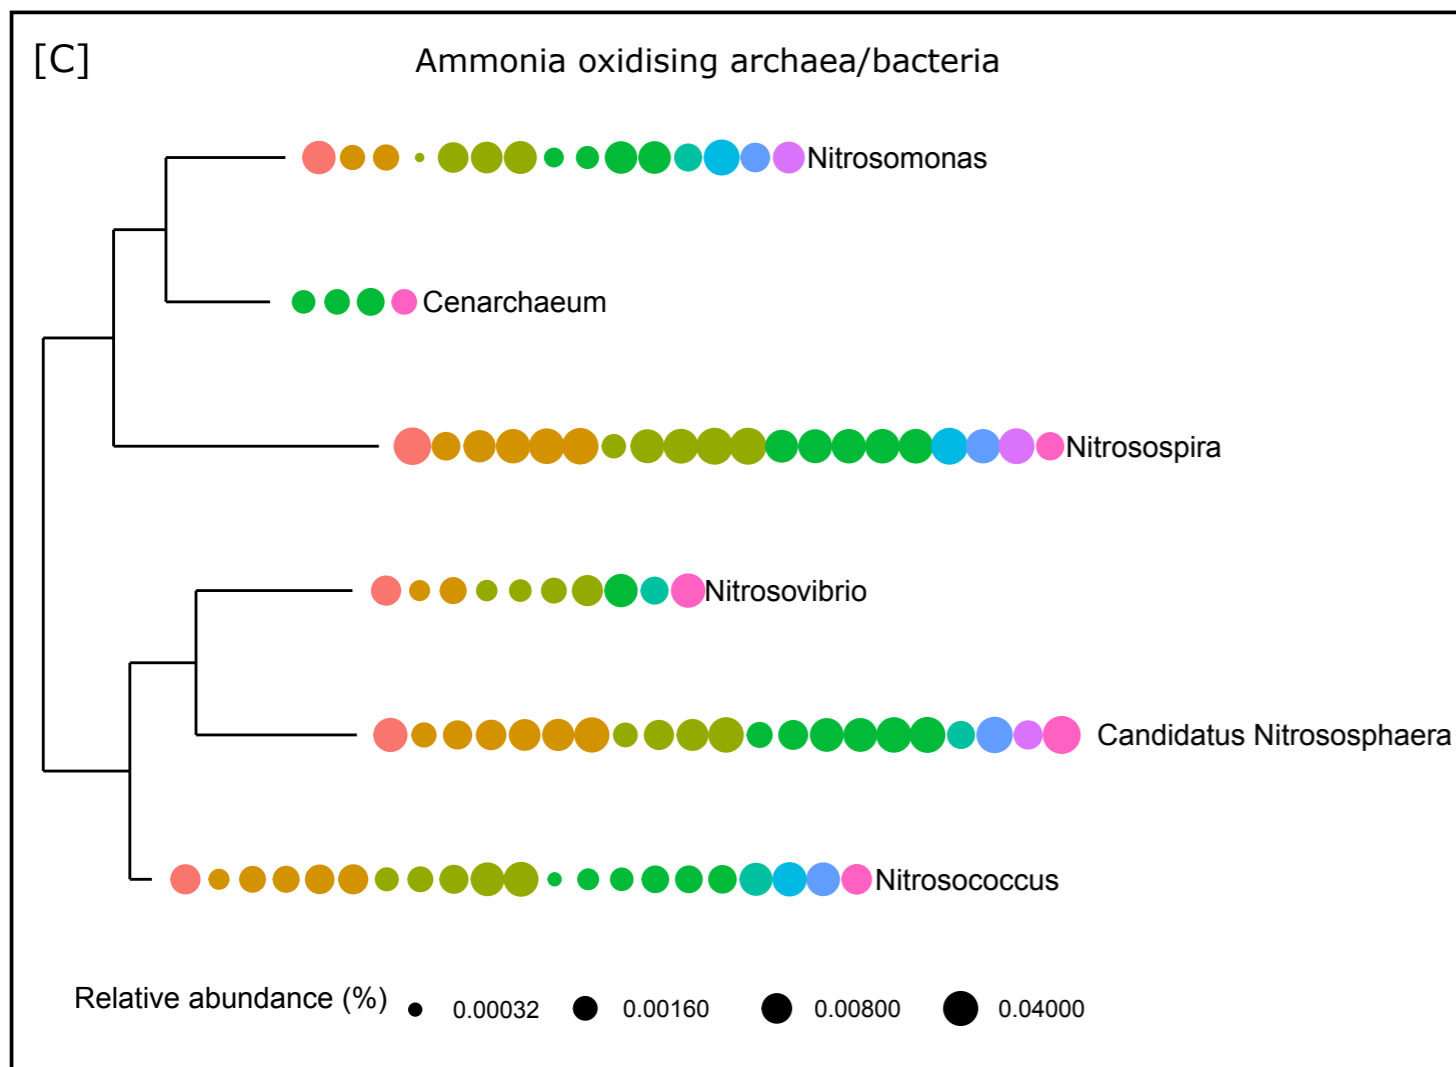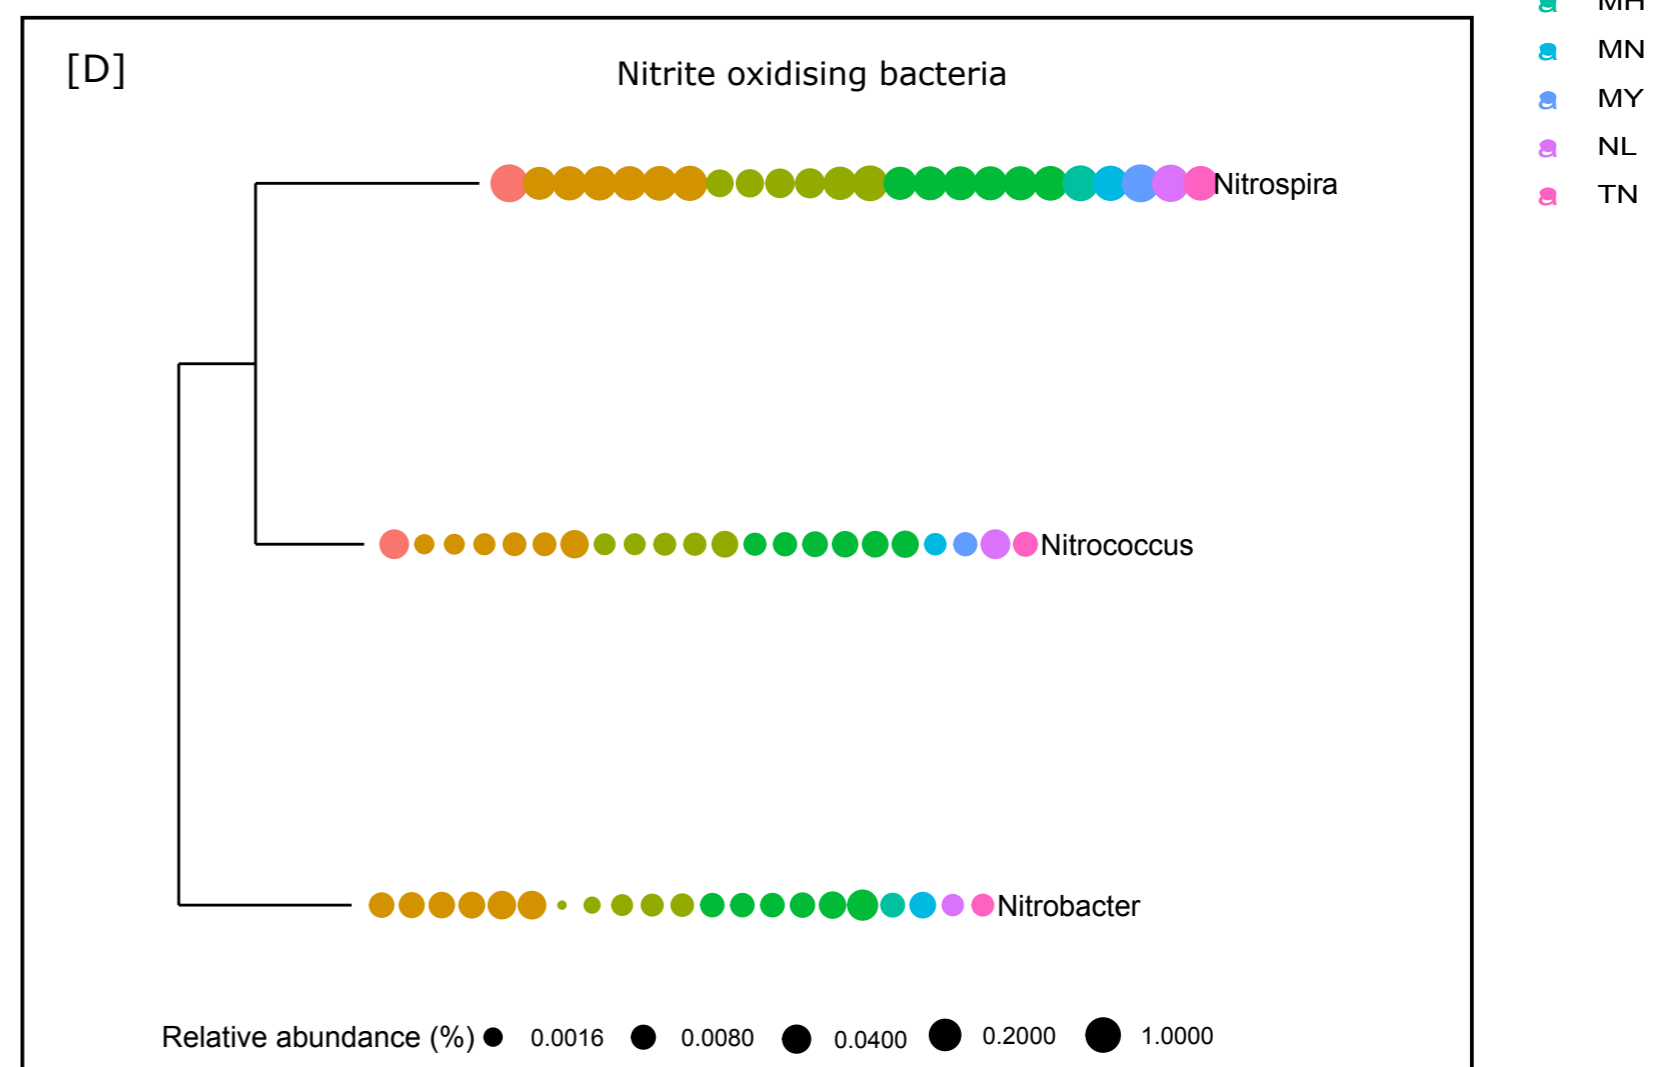

Figure S9: Phylogenetic tree representation of [A] methanogens, [B] methanotrophs, [C] ammonia oxidizers and [D] nitrite oxidizers.

**Jaccard distance 0.5**

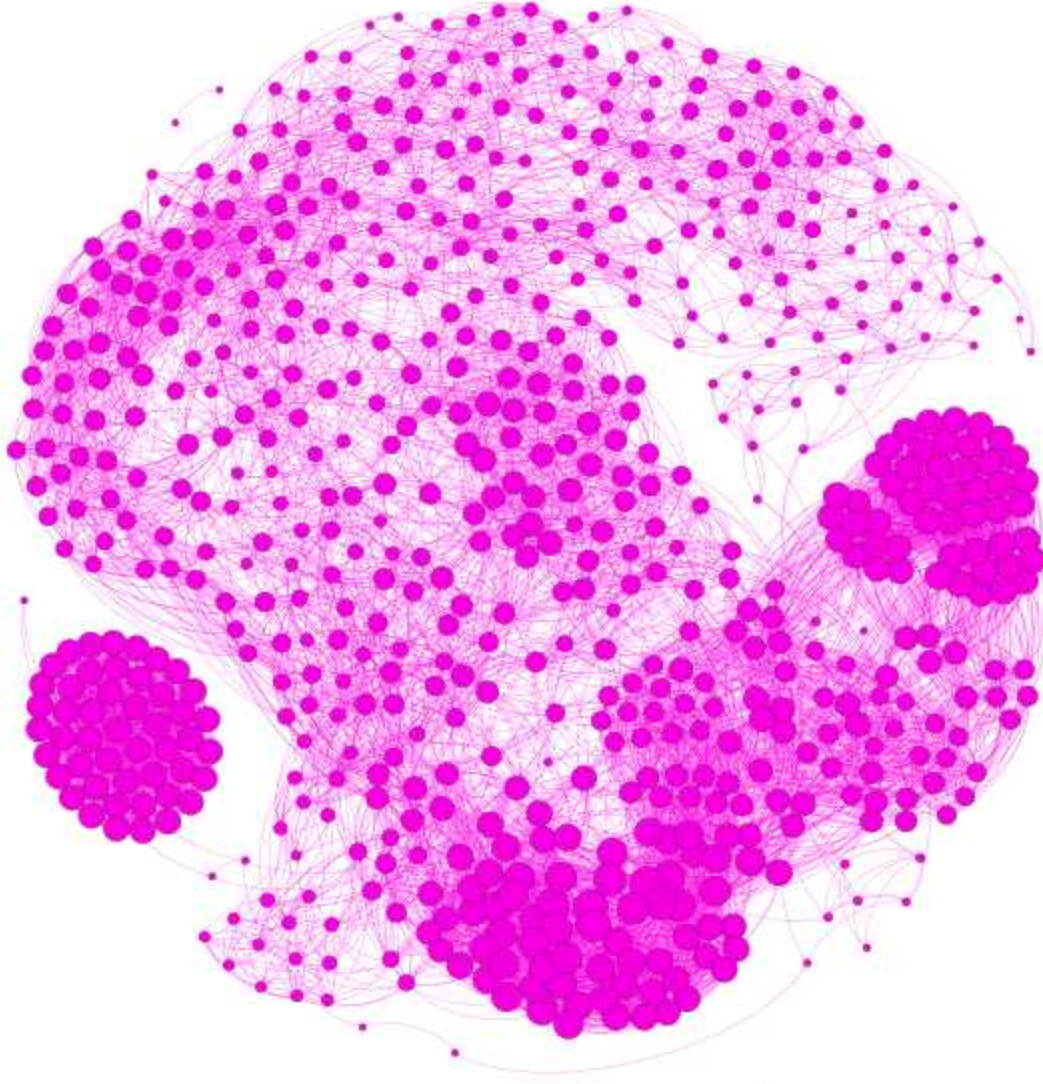

Pre Plough

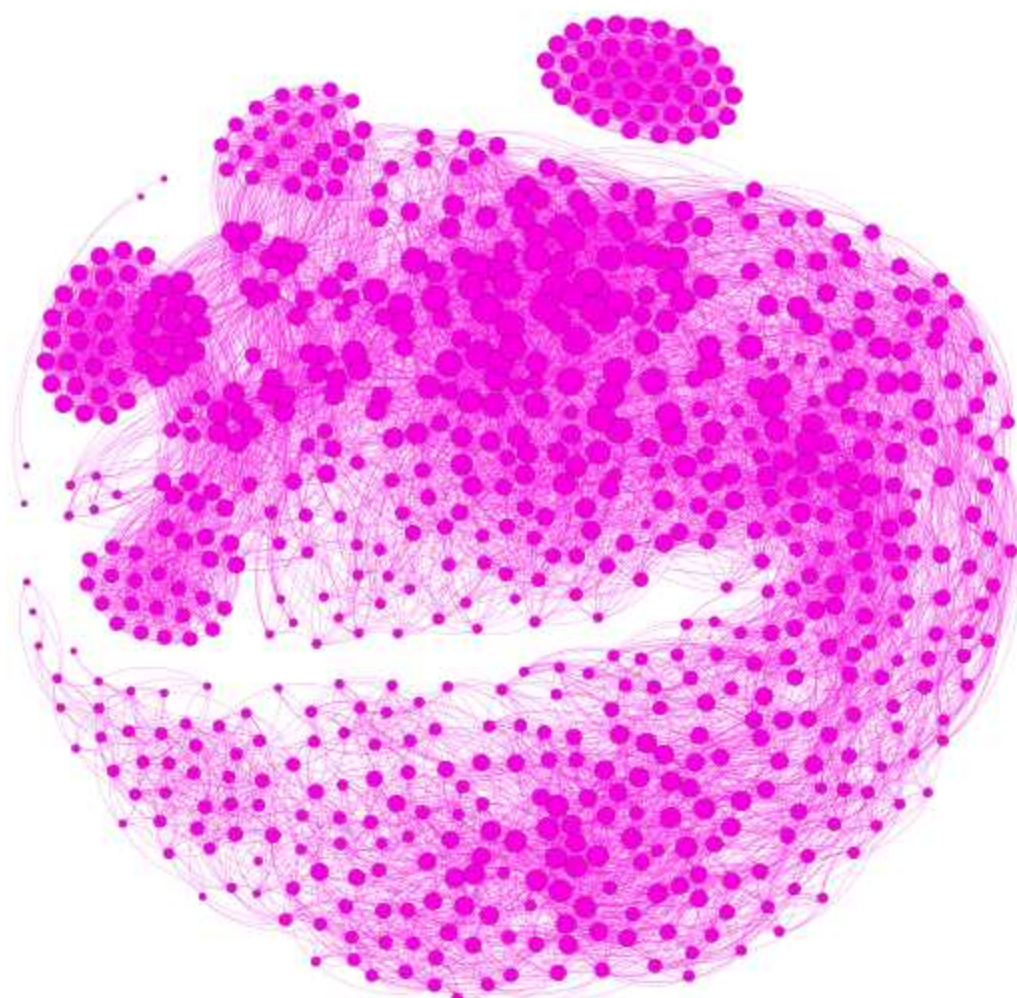

Post Plough

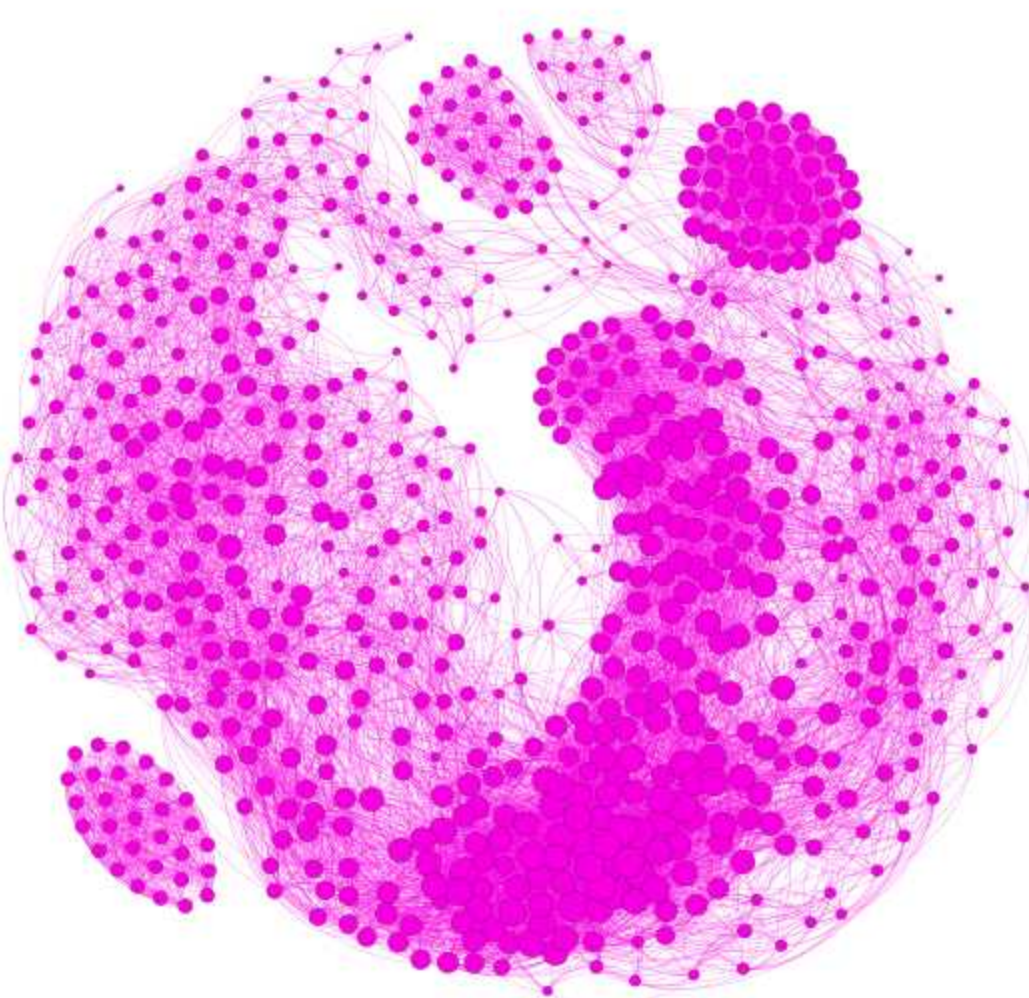

Vegetative

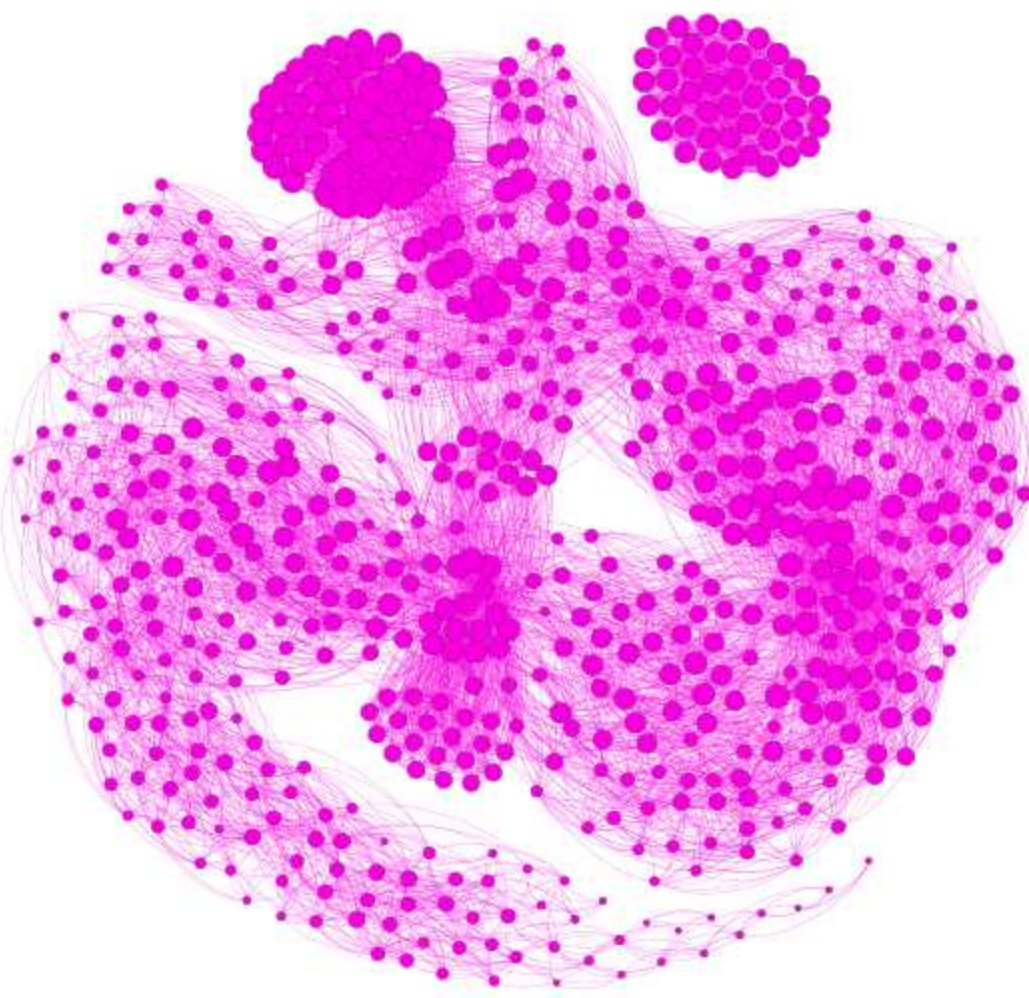

Reproductive

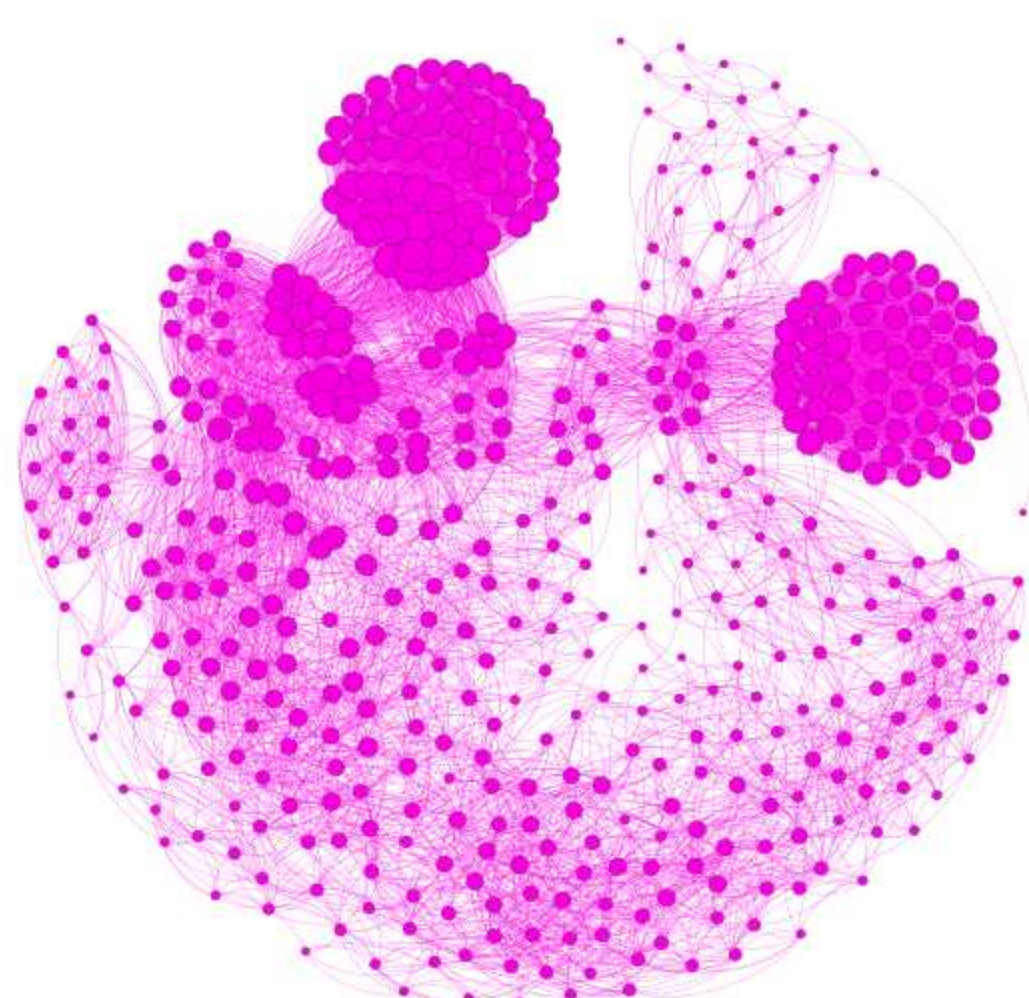

Ripening

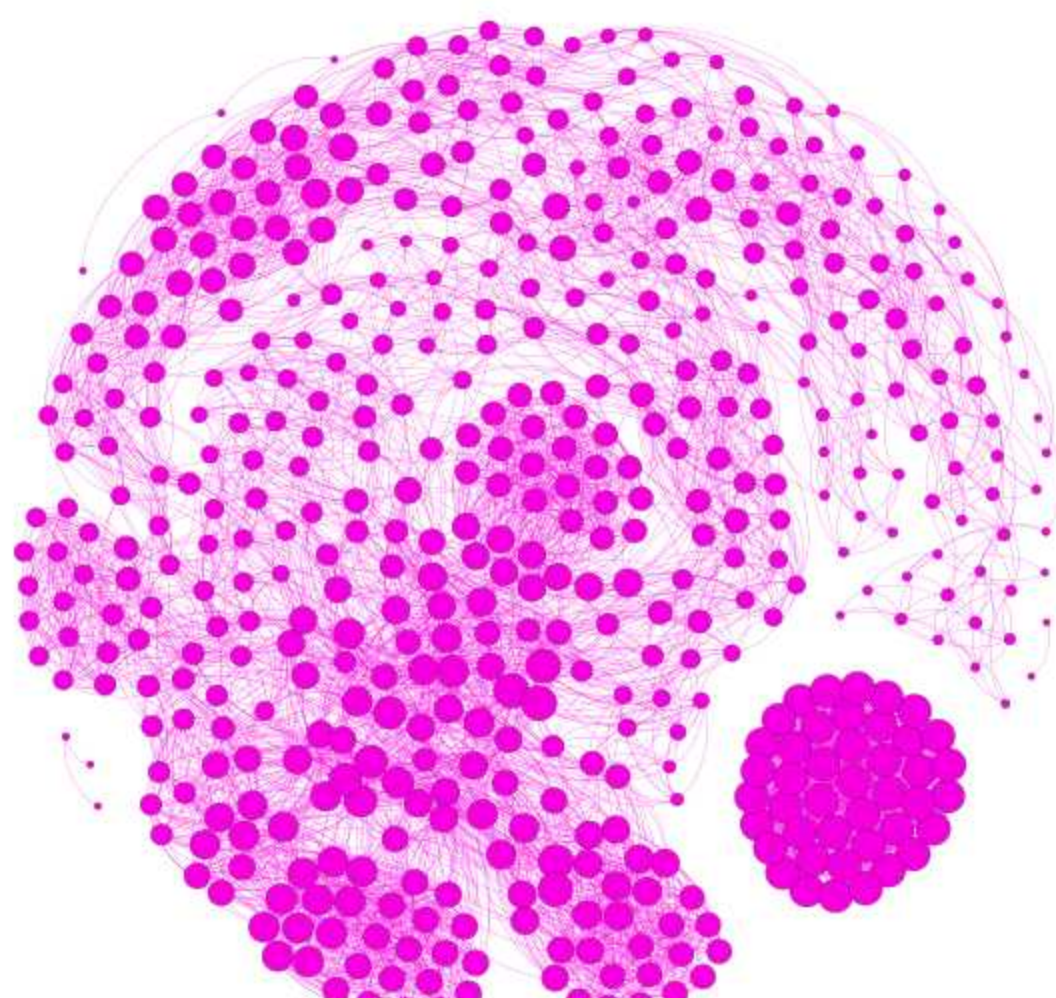

After harvest

Figure S10: Network complexity map for 0.5 jaccard distance.

Table S1: Summary of descriptive statistics: The raw 16S rRNA gene amplicon samples after quality control had over  $2.7 \times 10^8$  bp covering over 0.8 million sequences. The mean GC content had little change after quality control ( $57.33 \pm 0.55$ ).

| Samples | MG-RAST id   | Pre Quality Control |                |                     |                    | Post Quality Control |               |                    |                    |
|---------|--------------|---------------------|----------------|---------------------|--------------------|----------------------|---------------|--------------------|--------------------|
|         |              | bp Count            | Sequences      | Mean                | Mean GC            | bp Count             | Sequences     | Mean               | Mean GC            |
| NL      | mgm4758101.3 | 85713814            | 249777         | 343                 | 57                 | 7594091              | 34842         | 218                | 57                 |
| DL      | mgm4758122.3 | 35772800            | 102324         | 350                 | 57                 | 4358290              | 18533         | 235                | 57                 |
| MN      | mgm4758113.3 | 68682636            | 193710         | 355                 | 57                 | 6881801              | 29227         | 235                | 57                 |
| MH      | mgm4758109.3 | 33666969            | 95650          | 352                 | 57                 | 4358289              | 18500         | 236                | 57                 |
| KVR1    | mgm4758110.3 | 282936617           | 792550         | 357                 | 57                 | 15508019             | 68501         | 226                | 57                 |
| KKPH    | mgm4758107.3 | 82996827            | 235076         | 353                 | 58                 | 6250112              | 27676         | 226                | 58                 |
| KCR2    | mgm4758115.3 | 90237018            | 263850         | 342                 | 58                 | 7169520              | 33025         | 217                | 57                 |
| KVP2    | mgm4758116.3 | 33406435            | 91513          | 365                 | 58                 | 4278381              | 16700         | 256                | 57                 |
| KCP2    | mgm4758111.3 | 22895936            | 63718          | 359                 | 59                 | 2844779              | 11301         | 252                | 58                 |
| KCR1    | mgm4758106.3 | 114542703           | 323871         | 354                 | 57                 | 9781609              | 41968         | 233                | 57                 |
| KKP2    | mgm4758114.3 | 79046941            | 217389         | 364                 | 58                 | 6337258              | 26191         | 242                | 57                 |
| KVP1    | mgm4758117.3 | 103002592           | 298914         | 345                 | 57                 | 9094676              | 41268         | 220                | 57                 |
| KCP1    | mgm4758118.3 | 77119738            | 222450         | 347                 | 59                 | 6115019              | 27275         | 224                | 58                 |
| KKR1    | mgm4758121.3 | 136837318           | 377230         | 363                 | 58                 | 8987558              | 37321         | 241                | 57                 |
| TN      | mgm4758112.3 | 45085761            | 131121         | 344                 | 58                 | 5555129              | 22831         | 243                | 58                 |
| KCV     | mgm4758108.3 | 52168250            | 148732         | 351                 | 59                 | 5198619              | 21896         | 237                | 58                 |
| KKP1    | mgm4758105.3 | 85352169            | 236272         | 361                 | 58                 | 6954858              | 29304         | 237                | 57                 |
| KKR2    | mgm4758119.3 | 130963548           | 368574         | 355                 | 58                 | 8995413              | 39428         | 228                | 57                 |
| KKV     | mgm4758120.3 | 99396412            | 276090         | 360                 | 58                 | 7792282              | 32063         | 243                | 57                 |
| KVR2    | mgm4758103.3 | 175731859           | 487824         | 360                 | 57                 | 11446769             | 48880         | 234                | 57                 |
| KVV     | mgm4758102.3 | 329568367           | 920823         | 358                 | 57                 | 23601732             | 87006         | 271                | 58                 |
| KVAH    | mgm4758099.3 | 269158188           | 751122         | 358                 | 58                 | 14694503             | 65122         | 226                | 57                 |
| KCAH    | mgm4758100.3 | 224806236           | 665378         | 338                 | 59                 | 18986392             | 71005         | 267                | 59                 |
| MY      | mgm4758104.3 | 49246146            | 141163         | 349                 | 57                 | 5040095              | 21995         | 229                | 57                 |
| Total   |              | <b>2708335280</b>   | <b>7655121</b> | <b>353.45± 7.33</b> | <b>57.75± 0.72</b> | <b>207825194</b>     | <b>871858</b> | <b>236.5± 13.7</b> | <b>57.33± 0.55</b> |

Table S2: Tabulated chart of uncultured/unclassified taxa relative abundance in each cultivation stage in different locations.

| species                                 | KVP1     | KVP2     | KVV      | KVR1     | KVR2     | KVPH     | KCP1     | KCP2     | KCV      | KCR1      | KCR2     | KCPH     | KKP1     | KKP2     | KKV      | KKR1     | KKR2     | KKPH     | MYS_R    | NLVS_R   | DLS_R    | MNS_R    | MHS_R    | TNS_R    |
|-----------------------------------------|----------|----------|----------|----------|----------|----------|----------|----------|----------|-----------|----------|----------|----------|----------|----------|----------|----------|----------|----------|----------|----------|----------|----------|----------|
| uncultured Achromobacter sp.            | 0.000683 | 0        | 0.000291 | 0.002614 | 0.007563 | 0        | 0        | 0        | 0        | 0         | 0        | 0.013788 | 0        | 0        | 0.001518 | 0.011222 | 0.000689 | 0        | 0.002884 | 0        | 0        | 0        | 0.001406 | 0        |
| uncultured Acidovorax sp.               | 0        | 0        | 0.01061  | 0.000327 | 0.001621 | 0        | 0        | 0        | 0        | 0.000958  | 0        | 0.000492 | 0.001295 | 0.001735 | 0.000506 | 6.68E-05 | 0.000344 | 0        | 0.009502 | 0.00122  | 0        | 0.00454  | 0.002812 | 0        |
| uncultured actinobacterium              | 0        | 0        | 0        | 0        | 0.00054  | 0        | 0        | 0        | 0        | 0.0027301 | 0        | 0        | 0        | 0        | 0        | 0        | 0        | 0        | 0        | 0        | 0        | 0        | 0        | 0        |
| uncultured Afipia sp.                   | 0        | 0        | 0.000291 | 0        | 0.00081  | 0        | 0        | 0        | 0        | 0.000479  | 0        | 0        | 0        | 0        | 0        | 0.000134 | 0        | 0        | 0        | 0        | 0        | 0.000757 | 0        | 0        |
| uncultured alpha proteobacterium        | 0.644804 | 0.671945 | 1.077305 | 0.853144 | 1.793981 | 0.841512 | 0.159443 | 0.335322 | 0.318776 | 1.206054  | 0.943467 | 0.364406 | 0.625656 | 0.714934 | 0.738937 | 0.138143 | 0.922706 | 0.539562 | 5.475521 | 1.85549  | 3.87618  | 0.515339 | 1.275381 | 1.714279 |
| uncultured ammonia-oxidizing bacterium  | 0        | 0        | 0        | 0        | 0        | 0        | 0        | 0        | 0        | 0         | 0        | 0        | 0        | 0        | 0        | 0        | 0        | 0        | 0        | 0        | 0        | 0.001513 | 0        | 0.001217 |
| uncultured Antarctic sea ice bacterium  | 0        | 0        | 0        | 0        | 0        | 0        | 0        | 0        | 0        | 0         | 0        | 0        | 0        | 0        | 0        | 0        | 0.000344 | 0        | 0.005768 | 0.00061  | 0        | 0        | 0        | 0        |
| uncultured archaeon                     | 0.081967 | 0.750576 | 0.452172 | 0.18396  | 0.098045 | 0.154926 | 0.074453 | 0.138074 | 0.145185 | 0.06083   | 0.377347 | 0.075343 | 0.349745 | 0.292105 | 0.302155 | 0.019907 | 0.073679 | 0.082666 | 0.044704 | 0.006712 | 0.010493 | 0.151348 | 0.029529 | 0.695931 |
| uncultured Azarcus sp.                  | 0.001366 | 0        | 0.000291 | 0        | 0.00054  | 0.002389 | 0.694664 | 0        | 0        | 0         | 0        | 0        | 0        | 0.000578 | 0.000506 | 0        | 0        | 0.004468 | 0        | 0.002441 | 0        | 0        | 0        | 0        |
| uncultured Azospira sp.                 | 0.00888  | 0        | 0        | 0        | 0        | 0        | 0        | 0        | 0        | 0         | 0        | 0        | 0        | 0        | 0        | 0        | 0        | 0        | 0.001442 | 0        | 0        | 0        | 0        | 0        |
| uncultured Azospirillum sp.             | 0        | 0        | 0        | 0        | 0.00027  | 0        | 0        | 0        | 0        | 0         | 0        | 0        | 0        | 0        | 0        | 0        | 0        | 0        | 0        | 0        | 0        | 0        | 0        | 0        |
| uncultured Bacillus sp.                 | 0        | 0        | 0.000145 | 0.00049  | 0        | 0.001536 | 0.168574 | 0.004931 | 0        | 0.000479  | 0.000396 | 0.000492 | 0.002591 | 0.001157 | 0.043526 | 0.0002   | 0.001033 | 0.001117 | 0.002884 | 0        | 0        | 0.003027 | 0        | 0.001217 |
| uncultured bacterium                    | 24.56541 | 29.00263 | 27.73916 | 28.69044 | 39.5027  | 27.54074 | 18.04581 | 14.8528  | 18.38592 | 34.35578  | 17.2518  | 24.95691 | 29.2452  | 25.93315 | 29.94569 | 5.976298 | 37.77931 | 28.95204 | 48.45771 | 41.40532 | 43.13746 | 32.42172 | 45.71123 | 24.97567 |
| uncultured Bartonella sp.               | 0        | 0        | 0        | 0        | 0.00027  | 0        | 0        | 0        | 0        | 0         | 0        | 0        | 0        | 0        | 0        | 6.68E-05 | 0        | 0        | 0        | 0        | 0        | 0        | 0        | 0        |
| uncultured beta proteobacterium         | 0.502729 | 0.403882 | 0.581675 | 0.454182 | 0.571254 | 0.347559 | 1.085193 | 0.054243 | 0.076801 | 1.309512  | 0.232153 | 0.328458 | 0.167101 | 0.454064 | 0.752603 | 0.162993 | 1.007058 | 0.109476 | 2.173192 | 1.069607 | 3.091291 | 1.428723 | 1.220541 | 0.413666 |
| uncultured Bradyrhizobium sp.           | 0.004098 | 0.062548 | 0.008721 | 0.017971 | 0.023768 | 0.003754 | 0.001405 | 0.004931 | 0.004208 | 0.045502  | 0.000198 | 0.003447 | 0.034975 | 0.008098 | 0.013665 | 0.004876 | 0.023068 | 0.012288 | 0.001442 | 0.004271 | 0.004197 | 0.005297 | 0.084369 | 0.006083 |
| uncultured Burkholderia sp.             | 0.000683 | 0        | 0.001017 | 0.006045 | 0.025929 | 0.000682 | 0.000702 | 0        | 0        | 0.001437  | 0        | 0.001477 | 0.001295 | 0        | 0.003543 | 0.001536 | 0.001377 | 0        | 0.001442 | 0.048202 | 0        | 0.003784 | 0.012655 | 0        |
| uncultured Burkholderiales bacterium    | 0.008197 | 0.003574 | 0.01061  | 0.010293 | 0.018907 | 0.003924 | 0        | 0        | 0        | 0.163809  | 0.033674 | 0.003447 | 0.006477 | 0.006941 | 0.036441 | 0.002472 | 0.071957 | 0.012288 | 0.207657 | 0.34596  | 0.167891 | 0.024972 | 0.113898 | 0.046233 |
| uncultured Cellvibrio sp.               | 0        | 0        | 0        | 0        | 0.00054  | 0        | 0        | 0        | 0        | 0         | 0        | 0        | 0        | 0        | 0        | 0        | 0        | 0        | 0        | 0        | 0        | 0        | 0        | 0        |
| uncultured Clostridium sp.              | 0.017076 | 0.051826 | 0.005523 | 0.001634 | 0.00135  | 0.004948 | 0.007024 | 0.054243 | 0.037874 | 0.022512  | 0.032684 | 0.006894 | 0.018135 | 0.013882 | 0.011135 | 0.000334 | 0.003787 | 0.00782  | 0.096618 | 0.002441 | 0.006296 | 0.017405 | 0.033748 | 0.0292   |
| uncultured Comamonadaceae bacterium     | 0.004098 | 0.001787 | 0.004506 | 0.00147  | 0.02674  | 0.001365 | 0.002107 | 0        | 0.003156 | 0.169556  | 0.005744 | 0.010834 | 0.002591 | 0.001157 | 0.014678 | 0.000868 | 0.001721 | 0.001117 | 0.031725 | 0.012203 | 0.075551 | 0.060539 | 0.111086 | 0.0292   |
| uncultured Cupriavidus sp.              | 0        | 0        | 0        | 0        | 0        | 0        | 0        | 0        | 0        | 0         | 0        | 0        | 0        | 0        | 0        | 6.68E-05 | 0        | 0        | 0        | 0.00061  | 0        | 0.001513 | 0        | 0        |
| uncultured cyanobacterium               | 0.013661 | 0.001787 | 0.004796 | 0.00147  | 0.002971 | 0.000682 | 0.004214 | 0.009862 | 0        | 0.028259  | 0.027533 | 0.00197  | 0.002591 | 0.000578 | 0.005567 | 0.000334 | 0.004476 | 0.002234 | 0.044704 | 0.056135 | 0.056663 | 0.00454  | 0.012655 | 0.063266 |
| uncultured Dehalococcoides sp.          | 0.168032 | 0.046464 | 0.020784 | 0.022056 | 0.009183 | 0.029177 | 0.0295   | 0.078899 | 0.049447 | 0.009579  | 0.006141 | 0.027577 | 0.046633 | 0.017353 | 0.015184 | 0.001536 | 0.005853 | 0.006703 | 0.002884 | 0.00061  | 0        | 0.015135 | 0.01828  | 0.002433 |
| uncultured delta proteobacterium        | 5.700781 | 4.759011 | 3.37232  | 3.444924 | 4.512233 | 6.167504 | 4.354117 | 2.874895 | 2.510231 | 2.849411  | 1.906941 | 4.209386 | 9.164626 | 4.750033 | 4.499927 | 0.93761  | 4.932002 | 4.83707  | 1.721826 | 3.430308 | 3.278069 | 6.557898 | 2.45655  | 2.283677 |
| uncultured Desulfobacteraceae bacterium | 0        | 0        | 0.000291 | 0.001307 | 0.041325 | 0.002389 | 0.004214 | 0        | 0.001052 | 0.001916  | 0.000396 | 0.025114 | 0        | 0        | 0.001012 | 6.68E-05 | 0.003443 | 0        | 0        | 0.00061  | 0.002099 | 0.001513 | 0        | 0        |
| uncultured Desulfobacterium sp.         | 0.002049 | 0.003574 | 0.001017 | 0.001797 | 0.001621 | 0.001365 | 0.004917 | 0.014794 | 0.003156 | 0.002874  | 0.009706 | 0.004924 | 0.002591 | 0.002892 | 0.003543 | 0.0002   | 0.001033 | 0.004468 | 0.00721  | 0.00122  | 0.039874 | 0.005297 | 0        | 0.00365  |
| uncultured Desulfobacula sp.            | 0        | 0        | 0        | 0        | 0        | 0        | 0        | 0        | 0        | 0         | 0        | 0        | 0        | 0        | 0        | 0        | 0        | 0        | 0.001442 | 0.00061  | 0.002099 | 0        | 0        | 0        |
| uncultured Desulfobulbaceae bacterium   | 0.000683 | 0        | 0.001163 | 0.000163 | 0        | 0.000853 | 0.002107 | 0.004931 | 0.006312 | 0.008622  | 0.008319 | 0.004924 | 0.009067 | 0.024294 | 0.013159 | 0.000134 | 0        | 0.014522 | 0.080756 | 0.00061  | 0.010493 | 0.012108 | 0.011249 | 0        |
| uncultured Desulfobulbus sp.            | 0.000683 | 0        | 0.034011 | 0.00098  | 0.022688 | 0.001194 | 0        | 0        | 0.001052 | 0.006706  | 0.000198 | 0.006402 | 0        | 0        | 0.000506 | 0        | 0.004476 | 0        | 0        | 0        | 0        | 0.03027  | 0.002812 | 0        |
| uncultured Desulfovibrio sp.            | 0.000683 | 0        | 0.000291 | 0        | 0.00054  | 0.000512 | 0.00281  | 0        | 0.001052 | 0.008143  | 0        | 0.000985 | 0.002591 | 0.001157 | 0.001518 | 0.000134 | 0        | 0        | 0        | 0.002441 | 0        | 0.000757 | 0        | 0.00365  |
| uncultured Desulfovibrionales bacterium | 0.013661 | 0.019658 | 0.021947 | 0.004738 | 0.008643 | 0.015527 | 0.007726 | 0.014794 | 0.012625 | 0.019638  | 0.011687 | 0.033486 | 0.014249 | 0.008676 | 0.012147 | 0.004142 | 0.055087 | 0.008937 | 0.015863 | 0.002441 | 0.023085 | 0.012108 | 0.016874 | 0.013383 |
| uncultured Enterobacter sp.             | 0        | 0        | 0        | 0.00098  | 0.001621 | 0.000171 | 0        | 0        | 0        | 0.000958  | 0.012281 | 0        | 0        | 0        | 0        | 0        | 0.000344 | 0        | 0.002884 | 0        | 0        | 0        | 0        | 0.0292   |
| uncultured Enterobacteriaceae bacterium | 0        | 0        | 0.000436 | 0.000163 | 0.00135  | 0        | 0        | 0        | 0        | 0         | 0        | 0        | 0        | 0        | 0        | 0.000534 | 0        | 0        | 0        | 0        | 0        | 0.005297 | 0        | 0        |
| uncultured epsilon proteobacterium      | 0.099726 | 0.296656 | 0.075435 | 0.115016 | 0.095884 | 0.070297 | 0.536626 | 0.147936 | 0.046291 | 0.067056  | 0.060811 | 0.060078 | 0.031088 | 0.03297  | 0.021763 | 0.00648  | 0.038905 | 0.030162 | 0.099502 | 0.032949 | 0.054565 | 0.097619 | 0.097025 | 0.096116 |
| uncultured euryarchaeote                | 0        | 0        | 0        | 0        | 0.001621 | 0        | 0        | 0        | 0        | 0         | 0        | 0.00197  | 0        | 0        | 0        | 0        | 0.035462 | 0        | 0        | 0        | 0        | 0        | 0        | 0        |
| uncultured Firmicutes bacterium         | 0.005464 | 0        | 0.001163 | 0.003267 | 0.002701 | 0.001706 | 0.001405 | 0.004931 | 0        | 0.001916  | 0.000198 | 0        | 0.006477 | 0.001735 | 0.003543 | 0.000735 | 0.005164 | 0.004468 | 0.018747 | 0.003051 | 0.010493 | 0.00227  | 0.001406 | 0.001217 |
| uncultured forest soil bacterium        | 0.239069 | 1.095484 | 11.55501 | 19.61071 | 0.959383 | 15.42857 | 1.002311 | 1.267321 | 0.781686 | 1.383274  | 0.184217 | 0.740139 | 1.30183  | 21.9501  | 8.648605 | 83.53196 | 1.24221  | 0.340717 | 0.149975 | 0.11715  | 0.266527 | 1.866875 | 0.240452 | 0.18615  |
| uncultured gamma proteobacterium        | 1.135238 | 1.229516 | 1.040242 | 0.987275 | 1.560888 | 0.899012 | 0.742426 | 2.618472 | 1.509716 | 1.877096  | 0.443705 | 1.334023 | 1.082916 | 0.470839 | 0.586089 | 0.218037 | 0.672061 | 1.314834 | 1.821328 | 1.702341 | 1.775446 | 1.397696 | 1.366781 | 0.833414 |
| uncultured Geobacter sp.                | 0.096994 | 0.032168 | 0.03372  | 0.116323 | 0.039164 | 0.088724 | 0.036524 | 0.004931 | 0.016833 | 0.047897  | 0.065763 | 0.090609 | 0.051814 | 0.006941 | 0.146775 | 0.006613 | 0.025822 | 0.005586 | 0.059125 | 0.053694 | 0.270724 | 0.091565 | 0.033748 | 0.121666 |
| uncultured Geobacteraceae bacterium     | 0        | 0        | 0        | 0        | 0.010534 | 0        | 0        | 0        | 0        | 0         | 0        | 0.001477 | 0        | 0        | 0        | 0        | 0.000344 | 0        | 0        | 0        | 0        | 0        | 0        | 0        |
| uncultured Helicobacter sp.             | 0        | 0        | 0.000145 | 0        | 0        | 0        | 0        | 0        | 0        | 0         | 0        | 0        | 0        | 0        | 0        | 0        | 0.000344 | 0        | 0        | 0        | 0        | 0        | 0        | 0        |
| uncultured Hyphomicrobium sp.           | 0.007514 | 0.028593 | 0.005523 | 0.002287 | 0.004322 | 0.002047 | 0.000702 | 0        | 0        | 0.005269  | 0.004358 | 0.000492 | 0.029793 | 0.013304 | 0.007592 | 0.001269 | 0.002066 | 0.014522 | 0.015863 | 0.007932 | 0.002099 | 0.001513 | 0.035154 | 0.01095  |
| uncultured Klebsiella sp.               | 0        | 0        | 0.000291 | 0.010293 | 0.00081  | 0.000171 | 0.000702 | 0        | 0        | 0.033049  | 0.026147 | 0.002955 | 0        | 0        | 0        | 0        | 0.000344 | 0        | 0.48886  | 0        | 0        | 0.022702 | 0.004218 | 0.019467 |
| uncultured Legionella sp.               | 0        | 0        | 0.000291 | 0        | 0        | 0        | 0.000702 | 0        | 0        | 0         | 0        | 0        | 0        | 0        | 0        | 0        | 0        | 0        | 0        | 0        | 0        | 0        | 0        | 0        |
| uncultured Magnetospirillum sp.         | 0        | 0        | 0.004796 | 0.001634 | 0.002431 | 0.000171 | 0.002107 | 0        | 0        | 0.000958  | 0.000198 | 0.000492 | 0        | 0.001735 | 0        | 0.000267 | 0        | 0        | 0        | 0        | 0        | 0        | 0        | 0.001217 |
| uncultured marine bacterium             | 0.188523 | 0.037529 | 0.038517 | 0.121224 | 0.071035 | 0.03003  | 0.052679 | 0.03945  | 0.02525  | 0.204043  | 0.068933 | 0.019698 | 0.151556 | 0.052637 | 0.       |          |          |          |          |          |          |          |          |          |

Table S3: Comparative analysis of the difference between cropped and uncropped stages having significance ( $P < 0.05$ ) difference yield 143 genera.

| Sr. No | Genus                        | Cropped (% abundance) | Uncropped (% abundance) | Kruskal $P$ value |
|--------|------------------------------|-----------------------|-------------------------|-------------------|
| 1      | <i>Candidatus Solibacter</i> | 6.777                 | 3.181                   | 0.037             |
| 2      | <i>Acidobacterium</i>        | 2.745                 | 0.185                   | 0.003             |
| 3      | <i>Heliobacterium</i>        | 1.554                 | 3.831                   | 0.047             |
| 4      | <i>Herpetosiphon</i>         | 1.473                 | 2.587                   | 0.024             |
| 5      | <i>Saccharopolyspora</i>     | 1.206                 | 0.302                   | 0.038             |
| 6      | <i>Chthoniobacter</i>        | 0.844                 | 0.314                   | 0.019             |
| 7      | <i>Nocardioides</i>          | 0.64                  | 0.316                   | 0.024             |
| 8      | <i>Thermobifida</i>          | 0.527                 | 0.130                   | 0.031             |
| 9      | <i>Brevibacillus</i>         | 0.500                 | 0.110                   | 0.047             |
| 10     | <i>Aquimarina</i>            | 0.488                 | 0.040                   | 0.009             |
| 11     | <i>Chitinophaga</i>          | 0.404                 | 0.050                   | 0.012             |
| 12     | <i>Terrimonas</i>            | 0.304                 | 0.032                   | 0.047             |
| 13     | <i>Geodermatophilus</i>      | 0.289                 | 0.094                   | 0.009             |
| 14     | <i>Halomonas</i>             | 0.267                 | 0.065                   | 0.031             |
| 15     | <i>Dyella</i>                | 0.230                 | 0.046                   | 0.031             |
| 16     | <i>Isosphaera</i>            | 0.214                 | 0.097                   | 0.037             |
| 17     | <i>Actinocorallia</i>        | 0.153                 | 0.283                   | 0.031             |
| 18     | <i>Acinetobacter</i>         | 0.137                 | 0.020                   | 0.042             |
| 19     | <i>Hymenobacter</i>          | 0.137                 | 0.069                   | 0.038             |
| 20     | <i>Pseudomonas</i>           | 0.135                 | 0.031                   | 0.038             |
| 21     | <i>Selenomonas</i>           | 0.135                 | 0.317                   | 0.009             |
| 22     | <i>Methylacidiphilum</i>     | 0.130                 | 0.078                   | 0.046             |
| 23     | <i>Pantoea</i>               | 0.101                 | 0.007                   | 0.015             |
| 24     | <i>Sphingobacterium</i>      | 0.095                 | 0.013                   | 0.012             |
| 25     | <i>Ralstonia</i>             | 0.09                  | 0.043                   | 0.047             |
| 26     | <i>Rothia</i>                | 0.072                 | 0.040                   | 0.009             |
| 27     | <i>Flavobacterium</i>        | 0.070                 | 0.025                   | 0.031             |
| 28     | <i>Kineococcus</i>           | 0.070                 | 0.002                   | 0.003             |
| 29     | <i>Chromobacterium</i>       | 0.069                 | 0.003                   | 0.029             |
| 30     | <i>Pedobacter</i>            | 0.068                 | 0.006                   | 0.009             |
| 31     | <i>Cytophaga</i>             | 0.067                 | 0.022                   | 0.009             |
| 32     | <i>Ectothiorhodospira</i>    | 0.055                 | 0                       | 0.01              |
| 33     | <i>Sulfurihydrogenibium</i>  | 0.055                 | 0                       | 0.031             |
| 34     | <i>Novosphingobium</i>       | 0.052                 | 0.001                   | 0.001             |
| 35     | <i>Collinsella</i>           | 0.051                 | 0.134                   | 0.009             |
| 36     | <i>Thiomonas</i>             | 0.049                 | 0.009                   | 0.038             |
| 37     | <i>Cyanothece</i>            | 0.048                 | 0.002                   | 0.011             |
| 38     | <i>Dehalococcoides</i>       | 0.048                 | 0.129                   | 0.024             |
| 39     | <i>Castellaniella</i>        | 0.046                 | 0                       | 0.031             |
| 40     | <i>Microbispora</i>          | 0.045                 | 0.019                   | 0.03              |

|    |                             |       |       |       |
|----|-----------------------------|-------|-------|-------|
| 41 | <i>Bdellovibrio</i>         | 0.041 | 0.009 | 0.005 |
| 42 | <i>Acetivibrio</i>          | 0.04  | 0.092 | 0.047 |
| 43 | <i>Desulfonatronovibrio</i> | 0.038 | 0.004 | 0.02  |
| 44 | <i>Prosthecochloris</i>     | 0.036 | 0.061 | 0.015 |
| 45 | <i>Desulfomonile</i>        | 0.035 | 0.008 | 0.037 |
| 46 | <i>Methanosarcina</i>       | 0.035 | 0.003 | 0.006 |
| 47 | <i>Microcoleus</i>          | 0.034 | 0.001 | 0.002 |
| 48 | <i>Natronorubrum</i>        | 0.034 | 0.007 | 0.046 |
| 49 | <i>Tetrasphaera</i>         | 0.034 | 0.018 | 0.024 |
| 50 | <i>Pelomonas</i>            | 0.033 | 0.008 | 0.014 |
| 51 | <i>Achromobacter</i>        | 0.031 | 0     | 0.002 |
| 52 | <i>Variovorax</i>           | 0.031 | 0.002 | 0.011 |
| 53 | <i>Flexibacter</i>          | 0.03  | 0.003 | 0.024 |
| 54 | <i>Petrotoga</i>            | 0.027 | 0.1   | 0.019 |
| 55 | <i>Carboxydotherrmus</i>    | 0.025 | 0.009 | 0.03  |
| 56 | <i>Pimelobacter</i>         | 0.024 | 0.004 | 0.03  |
| 57 | <i>Bordetella</i>           | 0.023 | 0     | 0.002 |
| 58 | <i>Cupriavidus</i>          | 0.023 | 0.004 | 0.013 |
| 59 | <i>Deinococcus</i>          | 0.023 | 0.004 | 0.009 |
| 60 | <i>Desulfobulbus</i>        | 0.022 | 0.003 | 0.009 |
| 61 | <i>Methylosinus</i>         | 0.022 | 0.006 | 0.03  |
| 62 | <i>Parabacteroides</i>      | 0.021 | 0.003 | 0.015 |
| 63 | <i>Eggerthella</i>          | 0.02  | 0.005 | 0.037 |
| 64 | <i>Kytococcus</i>           | 0.02  | 0     | 0.033 |
| 65 | <i>Desulfatibacillum</i>    | 0.018 | 0.005 | 0.007 |
| 66 | <i>Gluconacetobacter</i>    | 0.018 | 0.007 | 0.009 |
| 67 | <i>Herbaspirillum</i>       | 0.017 | 0.004 | 0.012 |
| 68 | <i>Gardnerella</i>          | 0.016 | 0.003 | 0.03  |
| 69 | <i>Nonomuraea</i>           | 0.016 | 0.006 | 0.047 |
| 70 | <i>Streptomonospora</i>     | 0.016 | 0     | 0.042 |
| 71 | <i>Leptothrix</i>           | 0.015 | 0.001 | 0.03  |
| 72 | <i>Lysobacter</i>           | 0.015 | 0.001 | 0.014 |
| 73 | <i>Melittangium</i>         | 0.014 | 0.005 | 0.015 |
| 74 | <i>Desulfohalobium</i>      | 0.013 | 0.002 | 0.039 |
| 75 | <i>Elusimicrobium</i>       | 0.013 | 0.002 | 0.019 |
| 76 | <i>Halostagnicola</i>       | 0.012 | 0.001 | 0.004 |
| 77 | <i>Spirulina</i>            | 0.012 | 0.004 | 0.023 |
| 78 | <i>Desulfonatronum</i>      | 0.011 | 0.003 | 0.008 |
| 79 | <i>Sinorhizobium</i>        | 0.01  | 0     | 0.042 |
| 80 | <i>Acidaminococcus</i>      | 0.009 | 0.035 | 0.024 |
| 81 | <i>Acidovorax</i>           | 0.009 | 0.001 | 0.048 |
| 82 | <i>Pseudanabaena</i>        | 0.009 | 0.001 | 0.015 |
| 83 | <i>Acaryochloris</i>        | 0.008 | 0     | 0.005 |
| 84 | <i>Chlorogloeopsis</i>      | 0.008 | 0.001 | 0.013 |

|     |                         |       |       |       |
|-----|-------------------------|-------|-------|-------|
| 85  | <i>Legionella</i>       | 0.008 | 0.006 | 0.038 |
| 86  | <i>Phormidium</i>       | 0.008 | 0.001 | 0.03  |
| 87  | <i>Pyramidobacter</i>   | 0.008 | 0.002 | 0.038 |
| 88  | <i>Cronobacter</i>      | 0.007 | 0.001 | 0.007 |
| 89  | <i>Dolichospermum</i>   | 0.007 | 0.001 | 0.014 |
| 90  | <i>Limnothrix</i>       | 0.007 | 0     | 0.02  |
| 91  | <i>Sarcina</i>          | 0.007 | 0.003 | 0.03  |
| 92  | <i>Viridibacillus</i>   | 0.007 | 0     | 0.012 |
| 93  | <i>Acidiphilium</i>     | 0.006 | 0     | 0.001 |
| 94  | <i>Asticcacaulis</i>    | 0.006 | 0     | 0.033 |
| 95  | <i>Flectobacillus</i>   | 0.006 | 0     | 0.004 |
| 96  | <i>Swaminathania</i>    | 0.006 | 0     | 0.005 |
| 97  | <i>Thermincola</i>      | 0.006 | 0.003 | 0.048 |
| 98  | <i>Escherichia</i>      | 0.005 | 0.001 | 0.018 |
| 99  | <i>Microtetraspora</i>  | 0.005 | 0.002 | 0.046 |
| 100 | <i>Saccharothrix</i>    | 0.005 | 0     | 0.033 |
| 101 | <i>Segniliparus</i>     | 0.005 | 0.004 | 0.042 |
| 102 | <i>Xylella</i>          | 0.005 | 0     | 0     |
| 103 | <i>Dermacoccus</i>      | 0.004 | 0     | 0.021 |
| 104 | <i>Kozakia</i>          | 0.004 | 0     | 0.026 |
| 105 | <i>Mitsuaria</i>        | 0.004 | 0     | 0.031 |
| 106 | <i>Wautersiella</i>     | 0.004 | 0     | 0.026 |
| 107 | <i>Actinokineospora</i> | 0.003 | 0     | 0.003 |
| 108 | <i>Afipia</i>           | 0.003 | 0     | 0.005 |
| 109 | <i>Capnocytophaga</i>   | 0.003 | 0.001 | 0.042 |
| 110 | <i>Coxiella</i>         | 0.003 | 0     | 0.003 |
| 111 | <i>Kluyvera</i>         | 0.003 | 0     | 0.029 |
| 112 | <i>Rhodovibrio</i>      | 0.003 | 0     | 0.01  |
| 113 | <i>Sphaerotilus</i>     | 0.003 | 0     | 0.029 |
| 114 | <i>Spirobacillus</i>    | 0.003 | 0     | 0.01  |
| 115 | <i>Aeriscardovia</i>    | 0.002 | 0     | 0.021 |
| 116 | <i>Allochromatium</i>   | 0.002 | 0     | 0.012 |
| 117 | <i>Ancylobacter</i>     | 0.002 | 0     | 0.013 |
| 118 | <i>Caedibacter</i>      | 0.002 | 0     | 0.027 |
| 119 | <i>Cellvibrio</i>       | 0.002 | 0.013 | 0.034 |
| 120 | <i>Duganella</i>        | 0.002 | 0     | 0.04  |
| 121 | <i>Granulicatella</i>   | 0.002 | 0.001 | 0.021 |
| 122 | <i>Labrenzia</i>        | 0.002 | 0     | 0.029 |
| 123 | <i>Leucobacter</i>      | 0.002 | 0     | 0.001 |
| 124 | <i>Roseateles</i>       | 0.002 | 0     | 0.013 |
| 125 | <i>Scytonema</i>        | 0.002 | 0     | 0.04  |
| 126 | <i>Sinobacter</i>       | 0.002 | 0     | 0.012 |
| 127 | <i>Spirosoma</i>        | 0.002 | 0     | 0.005 |
| 128 | <i>Aquaspirillum</i>    | 0.001 | 0     | 0.031 |

---

|     |                               |       |       |       |
|-----|-------------------------------|-------|-------|-------|
| 129 | <i>Bergeyella</i>             | 0.001 | 0     | 0.029 |
| 130 | <i>Candidatus Midichloria</i> | 0.001 | 0     | 0.013 |
| 131 | <i>Desulfurivibrio</i>        | 0.001 | 0     | 0.029 |
| 132 | <i>Methylopila</i>            | 0.001 | 0     | 0.039 |
| 133 | <i>Oligella</i>               | 0.001 | 0     | 0.029 |
| 134 | <i>Pseudacidovorax</i>        | 0.001 | 0     | 0.005 |
| 135 | <i>Rhodobium</i>              | 0.001 | 0     | 0.005 |
| 136 | <i>Rhodotalassium</i>         | 0.001 | 0     | 0.04  |
| 137 | <i>Achleplasma</i>            | 0     | 0     | 0.029 |
| 138 | <i>Ensifer</i>                | 0     | 0     | 0.029 |
| 139 | <i>Leuconostoc</i>            | 0     | 0.001 | 0.031 |
| 140 | <i>Methylophilus</i>          | 0     | 0     | 0.029 |
| 141 | <i>Neisseria</i>              | 0     | 0     | 0.029 |
| 142 | <i>Photorhabdus</i>           | 0     | 0     | 0.04  |
| 143 | <i>Xenophilus</i>             | 0     | 0     | 0.029 |

---
